# Supplementary material for: Multilevel data integration and molecular docking approach to systematically elucidate the underlying pharmacological mechanisms of Er-Zhi-Wan against hepatocellular carcinoma
Source: Aging (Albany NY). 2022 Nov 7;14(21):8783–804. doi: 10.18632/aging.204369 (PMC9699749; doi:10.18632/aging.204369)
Supplement: Supplementary File 1 [file aging-14-204369-s001.xlsx]

## Sheet: Sheet1
Supplementary File 1. Based on the GSE84402 dataset, 1199 differentially expressed genes (DEGs) were identified in 14 pairs of liver tissues (hepatocellular carcinoma and paracancerous tissues).
id	log2FC	P.Value	adj.P.Val	Gene.Symbol
231951_at	-1.26643	0.00297355	0.0499482	GNAO1
229374_at	-1.28611	0.00297266	0.0499482	EPHA4
232227_at	-1.26111	0.00296729	0.0499206	LOC101928612
219167_at	1.27229	0.00295223	0.0497058	RASL12
1552885_a_at	1.07834	0.00295203	0.0497058	NKX6-3
210132_at	1.58205	0.0029425	0.0496192	EFNA3
201128_s_at	1.26014	0.00293225	0.0495008	ACLY
218285_s_at	-1.12926	0.00293319	0.0495008	BDH2
219615_s_at	-1.33094	0.00293002	0.0495008	KCNK5
223636_at	-1.33031	0.00292209	0.0494676	ZMYND12
202179_at	1.12035	0.0029059	0.049232	BLMH
241694_at	-1.20792	0.00288335	0.0488882	PKHD1
201908_at	1.03521	0.00287756	0.0488283	DVL3
238962_at	2.03834	0.00286958	0.0488013	ZNF681
215532_x_at	1.90928	0.00287371	0.0488013	ZNF492
1552400_a_at	1.29735	0.0028681	0.0488013	C15orf27
219343_at	-1.65136	0.00286574	0.0488013	CDC37L1
235039_x_at	1.04054	0.00283981	0.0484535	LIN9
225806_at	1.24276	0.00283035	0.0483684	AJUBA
232164_s_at	2.12447	0.00282362	0.0482915	EPPK1
234464_s_at	1.03541	0.00281261	0.0481793	EME1
206771_at	2.08256	0.00280734	0.048127	UPK3A
207636_at	1.6053	0.0028013	0.0480616	SERPINI2
231481_at	1.57174	0.00279907	0.0480616	CCNB3
201760_s_at	1.01272	0.00279416	0.0480616	WSB2
209138_x_at	-1.97027	0.00279855	0.0480616	IGLC1
206613_s_at	1.75665	0.00276954	0.0478394	TAF1A
225447_at	1.11343	0.0027773	0.0478394	GPD2
205755_at	-1.09207	0.00276765	0.0478394	ITIH3
210366_at	-1.59149	0.0027742	0.0478394	SLCO1B1
229097_at	1.22892	0.00275428	0.0477085	DIAPH3
219000_s_at	1.19016	0.00275342	0.0477085	DSCC1
219298_at	-2.31047	0.00274769	0.0476706	ECHDC3
202218_s_at	1.83219	0.00273155	0.0475048	FADS2
203867_s_at	1.52473	0.00272352	0.047442	NLE1
201202_at	1.30339	0.00272205	0.047442	PCNA
201941_at	1.16927	0.00272085	0.047442	CPD
221136_at	-1.72039	0.00272575	0.047442	GDF2
214742_at	1.66185	0.0026987	0.0471989	CEP131
204905_s_at	1.12921	0.00269479	0.0471989	EEF1E1
207537_at	-1.88274	0.00269659	0.0471989	PFKFB1
208884_s_at	1.09106	0.00269178	0.0471922	UBR5
219962_at	-1.31878	0.00268462	0.0471813	ACE2
200934_at	1.03512	0.00267914	0.0471381	DEK
223884_at	1.23213	0.00266358	0.0469258	OPTC
223649_s_at	1.00208	0.00266319	0.0469258	SLC25A39
210653_s_at	-1.02325	0.00266064	0.0469258	BCKDHB
232395_x_at	1.25885	0.00265524	0.0469192	AGBL3
231940_at	1.07884	0.00265671	0.0469192	ZNF529
226179_at	-1.12427	0.00264691	0.0468225	SLC25A37
205863_at	-1.73591	0.00264305	0.0467925	S100A12
224632_at	1.12074	0.00263718	0.0467269	GPATCH4
1553099_at	1.14529	0.00261578	0.0464237	TIGD1
243296_at	-1.69076	0.00261246	0.0464028	NAMPT
220097_s_at	1.09145	0.00259987	0.0462171	TMEM104
208758_at	1.06594	0.00259036	0.0460859	ATIC
210026_s_at	1.00309	0.00258047	0.0460099	CARD10
209933_s_at	-1.35951	0.00258397	0.0460099	CD300A
228468_at	1.07906	0.00257067	0.0458863	MASTL
218529_at	1.38377	0.00255574	0.0456951	CD320
238127_at	-1.0326	0.00255784	0.0456951	GAS6-AS1
206666_at	-1.67136	0.0025312	0.0452939	GZMK
209545_s_at	1.07758	0.00252576	0.0452627	RIPK2
222717_at	-1.32919	0.00252737	0.0452627	SDPR
241221_at	1.20194	0.00252097	0.045223	SEC14L3
1553851_at	-1.82635	0.00249487	0.0447918	SPIC
210199_at	-2.36222	0.00248963	0.0447348	CRYAA
227727_at	-1.49779	0.00248587	0.0447043	MRGPRF
224073_at	1.63019	0.00246587	0.0444185	LOC54944
216194_s_at	1.10438	0.0024635	0.0444127	TBCB
218622_at	1.11032	0.00244755	0.0441989	NUP37
235648_at	1.1249	0.00242147	0.0437644	ZNF567
214261_s_at	-1.24162	0.00241864	0.0437496	ADH6
221139_s_at	-1.1436	0.00240951	0.043621	CSAD
1552362_a_at	-1.22122	0.0024074	0.0436192	LEAP2
242073_at	1.76054	0.00239936	0.0435379	RP11-61L19.3
1562527_at	1.7296	0.0024009	0.0435379	LOC441666
206211_at	-1.96541	0.00239982	0.0435379	SELE
209268_at	1.09158	0.00239483	0.0435372	VPS45
212247_at	1.0562	0.00239164	0.0435318	NUP205
219695_at	-1.40347	0.00238714	0.0435318	SMPD3
219778_at	-1.36681	0.00238207	0.0435214	ZFPM2
213920_at	-1.43261	0.00238391	0.0435214	CUX2
209071_s_at	1.23491	0.00237147	0.0434137	RGS5
214599_at	1.47383	0.00235509	0.0431773	IVL
207122_x_at	-1.29133	0.00235165	0.0431508	SULT1A2
231895_at	1.56912	0.0023478	0.0431336	SASS6
220770_s_at	1.23074	0.00234347	0.0431336	ZBED8
202212_at	1.14412	0.00234872	0.0431336	PES1
222369_at	1.07686	0.00234828	0.0431336	NAA40
204141_at	1.26248	0.00233754	0.0430791	TUBB2A
241937_s_at	1.15898	0.00233612	0.0430791	WDR4
205289_at	1.08875	0.00233779	0.0430791	BMP2
213592_at	-1.35839	0.00233556	0.0430791	APLNR
210909_x_at	-1.13454	0.00232443	0.0430526	LPAL2
205733_at	1.48617	0.00231473	0.0429097	BLM
219531_at	1.20497	0.00231469	0.0429097	CEP72
49452_at	-1.38292	0.002309	0.0429097	ACACB
215321_at	-1.65262	0.00231302	0.0429097	RUNDC3B
214156_at	-2.11005	0.0023139	0.0429097	MYRIP
218075_at	1.00552	0.00230424	0.0428988	AAAS
227045_at	1.19805	0.00230066	0.0428895	ZNF614
201328_at	-1.23729	0.00229773	0.0428895	ETS2
227055_at	-1.26517	0.00230176	0.0428895	METTL7B
203879_at	-1.41805	0.00229804	0.0428895	PIK3CD
213626_at	-1.30025	0.00229329	0.0428795	CBR4
221841_s_at	-1.54705	0.00229124	0.0428782	KLF4
223395_at	-1.38495	0.00228855	0.0428649	ABI3BP
208700_s_at	1.21863	0.00227829	0.0427829	TKT
213301_x_at	1.18939	0.0022822	0.0427829	TRIM24
203408_s_at	-1.4889	0.00227749	0.0427829	SATB1
219481_at	1.20276	0.00226091	0.0425679	TTC13
224839_s_at	-1.20474	0.00225452	0.0424846	GPT2
241418_at	1.85694	0.00222044	0.0418789	LOC344887
243483_at	-1.93708	0.00221384	0.0417908	TRPM8
202813_at	1.11363	0.00220832	0.041723	TARBP1
215826_x_at	1.30016	0.00219627	0.0415679	ZNF835
205790_at	-1.28949	0.00219494	0.0415679	SKAP1
207069_s_at	-1.16633	0.00217656	0.0413757	SMAD6
222453_at	-1.2995	0.00216966	0.0413171	CYBRD1
227165_at	1.22343	0.00215859	0.0412366	SKA3
206417_at	-1.44521	0.00215345	0.0411896	CNGA1
206825_at	1.47849	0.00214816	0.0411511	OXTR
202275_at	1.9394	0.00214022	0.0410816	G6PD
234784_at	1.31089	0.00213571	0.0410313	RP1-305G21.1
210272_at	-1.71375	0.00212404	0.0408797	CYP2B7P
229243_at	1.58074	0.00211615	0.0407641	RP11-111M22.4
234121_at	-1.34558	0.00210091	0.0405426	LOC100129069
208684_at	1.1515	0.00209393	0.040444	COPA
205628_at	1.14458	0.00207985	0.040208	PRIM2
205008_s_at	1.31694	0.0020727	0.0401414	CIB2
218715_at	1.08593	0.00206784	0.0400831	UTP6
226004_at	1.24414	0.00205877	0.0399789	CABLES2
212858_at	1.76114	0.00205418	0.0399256	PAQR4
204621_s_at	-1.27569	0.0020475	0.0398524	NR4A2
204726_at	1.60402	0.00203176	0.0395964	CDH13
213097_s_at	1.04521	0.00202773	0.0395534	DNAJC2
225491_at	-1.69791	0.00202447	0.0395256	SLC1A2
226181_at	-1.47584	0.00201654	0.0394063	TUBE1
213726_x_at	1.00041	0.00201324	0.0393773	TUBB4B
201714_at	1.24494	0.00201117	0.0393724	TUBG1
225075_at	1.23443	0.00201052	0.0393724	PDRG1
214470_at	-1.30843	0.00200943	0.0393724	KLRB1
225081_s_at	1.18565	0.00198521	0.0389927	CDCA7L
202340_x_at	-1.41095	0.00198637	0.0389927	NR4A1
214061_at	1.19288	0.00197993	0.0389369	TBC1D31
202998_s_at	1.17325	0.00197319	0.0389369	LOXL2
218059_at	1.08833	0.00197715	0.0389369	ZNF706
202925_s_at	1.1395	0.00196901	0.0388987	PLAGL2
203936_s_at	1.18873	0.00196264	0.0388083	MMP9
208938_at	1.01452	0.00195718	0.0387357	PRCC
204413_at	1.5003	0.00195106	0.0386742	TRAF2
220211_at	1.48322	0.00194975	0.0386742	FLJ13224
214123_s_at	1.33538	0.00195229	0.0386742	NOP14-AS1
228383_at	-1.77879	0.00194836	0.0386742	PNPLA7
238073_at	1.6651	0.00194355	0.0386425	ELAVL4
204432_at	1.25906	0.00193793	0.0385929	SOX12
223597_at	-2.09707	0.00193783	0.0385929	ITLN1
200652_at	1.12524	0.00192901	0.0385303	SSR2
1560679_at	-1.57627	0.00192701	0.038526	LINC01127
227135_at	-1.25979	0.00192521	0.0385256	NAAA
1570153_at	1.76896	0.00191104	0.0383081	CCDC169
227617_at	1.4238	0.00191257	0.0383081	TMEM201
224936_at	1.0391	0.00190748	0.0383081	EIF2S3
206709_x_at	-1.16662	0.00190549	0.0383079	GPT
217871_s_at	1.1473	0.0019001	0.0382581	MIF
212226_s_at	-1.13925	0.00190124	0.0382581	PPAP2B
214529_at	-1.26785	0.00188544	0.0380816	TSHB
220507_s_at	-2.30912	0.00187239	0.0378887	UPB1
220973_s_at	1.39775	0.00186912	0.037858	SHARPIN
218966_at	1.07983	0.00186582	0.0378265	MYO5C
219588_s_at	1.35459	0.00185869	0.0377173	NCAPG2
206683_at	1.69201	0.00185513	0.0376898	ZNF165
221577_x_at	1.48673	0.00185559	0.0376898	GDF15
201963_at	-1.37762	0.00185046	0.0376898	ACSL1
226344_at	-1.2167	0.0018395	0.0375036	ZMAT1
218816_at	1.92338	0.00183449	0.0374368	LRRC1
205083_at	-1.43422	0.00182613	0.0373365	AOX1
221522_at	1.01021	0.00181888	0.0372234	ANKRD27
205111_s_at	1.03608	0.00181092	0.0370955	PLCE1
205384_at	-1.54792	0.00180429	0.0369947	FXYD1
213924_at	2.0136	0.0017985	0.0369246	GNAL
210589_s_at	1.28012	0.00179916	0.0369246	GBAP1
204541_at	-1.3095	0.00179146	0.0368715	SEC14L2
240185_at	1.45462	0.00178327	0.0367378	LOC100147773
222584_at	1.01661	0.00177914	0.0366875	MSTO1
205471_s_at	-1.39958	0.00176632	0.0364579	DACH1
229090_at	1.09648	0.00176392	0.0364432	ZEB1-AS1
205412_at	-1.17542	0.00175975	0.0363917	ACAT1
212445_s_at	1.30408	0.00175184	0.0362627	NEDD4L
236822_at	-1.88117	0.00175091	0.0362627	RP11-327J17.2
201704_at	1.08116	0.00174179	0.0361585	ENTPD6
243421_at	1.96515	0.0017274	0.0358941	RP11-355F16.1
209830_s_at	-1.33562	0.00171127	0.035593	SLC9A3R2
1553956_at	1.11017	0.00170574	0.0355123	TMEM237
223360_at	1.15898	0.00170056	0.0354383	SPATC1L
202003_s_at	-1.32965	0.00169995	0.0354383	ACAA2
227870_at	2.66572	0.00169181	0.0353647	IGDCC4
201177_s_at	1.1539	0.00168737	0.0353647	UBA2
222234_s_at	1.10927	0.00169212	0.0353647	DBNDD1
1556364_at	-1.55588	0.00169096	0.0353647	ADAMTS9-AS2
1565346_a_at	1.45203	0.00168245	0.0352989	ATP1A4
218412_s_at	1.04108	0.00167457	0.0352187	GTF2IRD1
212543_at	-1.12532	0.00167699	0.0352187	AIM1
201531_at	-1.21697	0.001677	0.0352187	ZFP36
205328_at	-1.53119	0.00166662	0.0351028	CLDN10
204744_s_at	1.19462	0.00166033	0.0350385	IARS
216486_x_at	1.28372	0.00165652	0.0349923	ZNF79
222843_at	1.27639	0.0016554	0.0349923	FIGNL1
204450_x_at	-1.05182	0.00163996	0.0347441	APOA1
206239_s_at	2.57805	0.00163569	0.0346875	SPINK1
232000_at	-1.19775	0.00163467	0.0346875	TTC39B
206177_s_at	-1.49883	0.00163536	0.0346875	ARG1
219725_at	2.09391	0.0016299	0.0346667	TREM2
1558034_s_at	-1.34488	0.00162922	0.0346667	CP
232790_at	1.31227	0.00162413	0.0346118	RNASEH1-AS1
204126_s_at	1.99894	0.00162074	0.0345736	CDC45
219863_at	-1.36855	0.00161448	0.0344742	HERC5
225638_at	1.06785	0.00160203	0.0342421	COA6
238113_at	-1.59912	0.00159961	0.0342242	SMIM2-AS1
212541_at	1.07527	0.00158717	0.0340252	FLAD1
204224_s_at	-1.48233	0.00158193	0.0339464	GCH1
223484_at	1.64404	0.00156971	0.0337177	C15orf48
231070_at	-2.63247	0.00156777	0.0337094	IYD
214430_at	1.01399	0.00156011	0.033578	GLA
228357_at	1.21657	0.00155147	0.0334519	UNK
205740_s_at	1.10439	0.0015527	0.0334519	RBM42
213283_s_at	1.43109	0.00153602	0.0331584	SALL2
213135_at	-1.31817	0.00153586	0.0331584	TIAM1
210377_at	-2.01607	0.00152643	0.0330172	ACSM3
200639_s_at	1.10025	0.00152464	0.0330115	YWHAZ
241704_x_at	1.40411	0.00151449	0.0328574	ZNF320
206643_at	-1.98428	0.00151222	0.032841	HAL
1558078_at	1.10471	0.00150026	0.0326142	BC041025
202421_at	1.37887	0.00149435	0.0325594	IGSF3
228455_at	1.13097	0.00149567	0.0325594	RP5-1074L1.4
228409_at	-1.39645	0.00149624	0.0325594	PLIN4
201516_at	1.06281	0.00148816	0.0325387	SRM
204462_s_at	-1.22338	0.00149038	0.0325387	SLC16A2
207008_at	-1.50254	0.00148899	0.0325387	CXCR2
223757_at	-1.7287	0.00149078	0.0325387	DIO3OS
235201_at	-1.19257	0.00148306	0.0325013	FOXP2
213241_at	1.53353	0.00148155	0.0325011	PLXNC1
201275_at	1.34671	0.00147905	0.0324791	FDPS
231947_at	-1.11176	0.00147835	0.0324791	MYCT1
223037_at	1.02417	0.00146329	0.0322311	PDZD11
200872_at	1.3261	0.00145893	0.0321678	S100A10
229584_at	-1.56197	0.00145886	0.0321678	LRRK2
204341_at	1.63006	0.0014479	0.0319898	TRIM16
227291_s_at	1.18016	0.00141717	0.0313747	BOLA3
201508_at	-1.0748	0.00141532	0.0313659	IGFBP4
213445_at	1.29218	0.00140885	0.031266	ZC3H3
220626_at	-1.31872	0.00140937	0.031266	SERPINA10
205657_at	-1.33607	0.0014007	0.0311376	HAAO
202715_at	1.27358	0.00139768	0.0311024	CAD
209278_s_at	-2.28273	0.00139005	0.0309738	TFPI2
243539_at	1.21979	0.00138182	0.0308763	KIAA1841
206949_s_at	1.02667	0.00137998	0.0308672	RUSC1
203155_at	1.01513	0.00137178	0.0307472	SETDB1
237048_at	1.40582	0.00136982	0.0307352	RP11-66N11.8
206849_at	1.5777	0.00136771	0.0307195	GABRG2
201381_x_at	1.27063	0.0013624	0.0306321	CACYBP
218542_at	1.94561	0.00135135	0.0304507	CEP55
244631_at	1.36523	0.00134636	0.0304507	LOC389834
205264_at	1.18845	0.00134884	0.0304507	CD3EAP
217978_s_at	1.13798	0.00134531	0.0304507	UBE2Q1
203606_at	1.07099	0.00134736	0.0304507	NDUFS6
206101_at	-1.21241	0.00135293	0.0304507	ECM2
235004_at	2.2525	0.00133982	0.0304086	RBM24
227787_s_at	1.1943	0.00133754	0.0303888	MED30
207877_s_at	1.60625	0.00132729	0.0301951	NVL
200783_s_at	1.26693	0.00132176	0.0301951	STMN1
235609_at	1.18062	0.00132762	0.0301951	BRIP1
219675_s_at	1.04811	0.00132704	0.0301951	UXS1
205768_s_at	-1.5922	0.00132233	0.0301951	SLC27A2
214023_x_at	2.18471	0.00131638	0.0301758	TUBB2B
203562_at	-1.28342	0.00131702	0.0301758	FEZ1
214829_at	-1.82269	0.00130853	0.0300449	AASS
209447_at	-1.61896	0.00129573	0.0298141	SYNE1
206226_at	-1.51411	0.0012938	0.0298014	HRG
209660_at	-1.11957	0.00129106	0.02977	TTR
225439_at	1.49671	0.00128938	0.029763	NUDCD1
202679_at	1.1715	0.00128344	0.0296575	NPC1
214274_s_at	-1.11837	0.00128213	0.0296575	ACAA1
202726_at	1.47923	0.00126834	0.0294027	LIG1
202475_at	1.24652	0.00125743	0.0292124	TMEM147
236075_s_at	1.23929	0.00125307	0.0291423	LOC101928000
203453_at	-1.52148	0.00124877	0.0290736	SCNN1A
218445_at	1.73095	0.00124536	0.0290254	H2AFY2
227892_at	1.20695	0.00124019	0.028936	PRKAA2
232228_at	1.42113	0.00123556	0.0289205	ZNF530
226287_at	1.29661	0.00123819	0.0289205	CCDC34
209301_at	-1.51625	0.00123687	0.0289205	CA2
220255_at	1.36447	0.00122624	0.0287656	FANCE
208691_at	1.43067	0.00122441	0.0287635	TFRC
205044_at	-1.8893	0.0012239	0.0287635	GABRP
227756_at	1.29632	0.00121832	0.0287354	FAM81A
225612_s_at	1.72685	0.00121324	0.0286518	B3GNT5
217665_at	1.4026	0.00121272	0.0286518	ZNF813
218687_s_at	1.36213	0.00120744	0.0286518	MUC13
217946_s_at	1.06582	0.00121166	0.0286518	SAE1
201956_s_at	1.04772	0.00121108	0.0286518	GNPAT
213905_x_at	-1.10284	0.00121023	0.0286518	BGN
206702_at	-1.33361	0.00121317	0.0286518	TEK
206153_at	-1.64748	0.00121345	0.0286518	CYP4F11
231790_at	-1.65031	0.00121224	0.0286518	DMGDH
224391_s_at	-1.39795	0.00119867	0.0285832	SIAE
223605_at	-1.52073	0.00119694	0.0285736	SLC25A18
201770_at	1.01876	0.00119455	0.028552	SNRPA
205568_at	-2.05842	0.00119472	0.028552	AQP9
230560_at	1.39492	0.00119042	0.0285121	STXBP6
205807_s_at	1.2943	0.00119004	0.0285121	TUFT1
218365_s_at	1.18166	0.00118657	0.028483	DARS2
213509_x_at	-1.55908	0.00118436	0.0284616	CES2
205221_at	-1.29929	0.001182	0.0284362	HGD
203466_at	1.16043	0.00117044	0.0281894	MPV17
202200_s_at	1.27955	0.00116837	0.0281751	SRPK1
213911_s_at	1.25709	0.00116854	0.0281751	H2AFZ
227890_at	1.0085	0.00116307	0.0281057	TMEM198
1567023_at	1.4479	0.00116132	0.0280948	OR5AK4P
223245_at	1.04524	0.00115729	0.0280288	STRBP
224885_s_at	1.08326	0.00115257	0.0279456	KRTCAP2
209495_at	1.08529	0.0011502	0.0279194	CEP250
210105_s_at	-1.12347	0.00114627	0.0278552	FYN
1559528_at	2.14973	0.00114492	0.0278537	LOC100129917
213874_at	-1.14925	0.00113479	0.0276383	SERPINA4
205936_s_at	-1.77549	0.00112782	0.0275167	HK3
204558_at	1.75364	0.0011237	0.0274717	RAD54L
204705_x_at	-1.44768	0.00112385	0.0274717	ALDOB
231455_at	-1.48423	0.00112414	0.0274717	LINC00487
219769_at	1.7334	0.00111688	0.0273869	INCENP
203477_at	1.74325	0.00111435	0.0273729	COL15A1
212909_at	1.71735	0.00111344	0.0273729	LYPD1
202690_s_at	1.27331	0.00111504	0.0273729	SNRPD1
232385_x_at	1.73805	0.00110343	0.0272241	CTC-462L7.1
223700_at	1.52966	0.00110435	0.0272241	MND1
226773_at	-1.09616	0.00110521	0.0272241	PPM1K
238752_at	-1.61008	0.00109292	0.0270137	GPLD1
221950_at	1.95864	0.00109124	0.0270028	EMX2
235052_at	1.19139	0.00109116	0.0270028	ZNF792
222073_at	-2.6045	0.00109033	0.0270028	COL4A3
241342_at	1.40992	0.00108666	0.0269822	TMEM65
205308_at	1.1168	0.001082	0.0268972	ZC2HC1A
210215_at	-1.34098	0.00107575	0.0267727	TFR2
244334_at	1.57571	0.00106821	0.0266592	TRAM1L1
236214_at	1.36713	0.00106873	0.0266592	FAM71F1
203856_at	1.29365	0.00106739	0.0266592	VRK1
218688_at	-1.25642	0.00106423	0.026639	DAK
235126_at	1.5144	0.00106034	0.0265837	FLVCR1-AS1
201289_at	-1.52629	0.0010608	0.0265837	CYR61
206350_at	-1.65251	0.00105859	0.0265837	APCS
200064_at	1.12055	0.00105486	0.026527	HSP90AB1
226569_s_at	1.01889	0.00105075	0.0264545	CHTF18
204240_s_at	1.05476	0.00104699	0.0263904	SMC2
203316_s_at	1.09824	0.00104516	0.0263752	SNRPE
234328_at	1.48098	0.00104304	0.0263524	RP4-730D4.1
1556421_at	1.42491	0.00104168	0.0263486	LOC286189
206983_at	1.75415	0.00102761	0.0260232	CCR6
224279_s_at	1.65305	0.00102411	0.0259837	CABYR
208763_s_at	-1.22196	0.0010217	0.0259837	TSC22D3
226992_at	-1.54773	0.00102377	0.0259837	NOSTRIN
211696_x_at	-1.8363	0.00102485	0.0259837	HBB
221250_s_at	1.59413	0.00101127	0.0257745	MXD3
219313_at	-2.13718	0.00101184	0.0257745	GRAMD1C
217256_x_at	1.08516	0.00100904	0.0257639	RP3-507I15.1
204163_at	-1.69282	0.0010087	0.0257639	EMILIN1
217286_s_at	1.05951	0.000990868	0.0253897	NDRG3
228988_at	1.5908	0.000987257	0.0253271	ZNF711
200788_s_at	1.00215	0.000987087	0.0253271	PEA15
202545_at	1.91176	0.000984144	0.0253072	PRKCD
1552767_a_at	1.95584	0.000978351	0.0252717	HS6ST2
228885_at	-1.62408	0.000981067	0.0252717	MAMDC2
207111_at	-1.64415	0.000981286	0.0252717	EMR1
220149_at	1.24386	0.000975998	0.0252477	C2orf54
207226_at	1.5186	0.000970713	0.025159	HIST1H2BN
229886_at	1.37875	0.000971409	0.025159	C5orf34
1564911_at	1.65101	0.000956379	0.0249081	SNHG4
202830_s_at	-1.00675	0.000958571	0.0249081	SLC37A4
211682_x_at	-1.34568	0.000957821	0.0249081	UGT2B28
218561_s_at	1.12289	0.000954088	0.0248891	LYRM4
227377_at	1.76214	0.000952542	0.0248787	IGF2BP1
204108_at	1.16438	0.000945803	0.0247624	NFYA
223170_at	1.33644	0.000925854	0.0242695	TMEM98
210677_at	2.20844	0.000894139	0.0234665	SOAT2
205429_s_at	1.22548	0.000892011	0.0234628	MPP6
222997_s_at	1.10731	0.000892912	0.0234628	MRPS21
206916_x_at	-1.68673	0.00088142	0.0232172	TAT
206629_at	-1.91917	0.000880132	0.0232115	ADAMTSL2
204478_s_at	1.08607	0.000875172	0.0231088	RABIF
229689_s_at	1.40104	0.000872556	0.0230679	RP13-39P12.3
227099_s_at	-1.50577	0.000872058	0.0230679	C11orf96
1556064_at	2.0328	0.000864292	0.0229608	LOC284926
209609_s_at	1.20265	0.000865761	0.0229608	MRPL9
223623_at	-2.00071	0.000866384	0.0229608	C2orf40
212539_at	1.29781	0.00086085	0.0228982	CHD1L
206364_at	1.68379	0.000854338	0.0227809	KIF14
212556_at	1.0516	0.000849921	0.0227132	SCRIB
239065_at	-1.01961	0.000848958	0.0227132	DNAJC22
225207_at	-1.61942	0.000850749	0.0227132	PDK4
207840_at	-1.19419	0.000839708	0.0225017	CD160
210072_at	-1.75473	0.000836557	0.022445	CCL19
208813_at	-1.15812	0.000823987	0.0221352	GOT1
204133_at	1.52491	0.000821919	0.0221346	RRP9
1560514_at	1.30225	0.000819273	0.0220908	LINC00636
215299_x_at	-1.42094	0.000817597	0.0220731	SULT1A1
210798_x_at	-2.02571	0.000817535	0.0220731	MASP2
213007_at	1.30379	0.000813222	0.0220374	FANCI
241742_at	-1.45635	0.00081288	0.0220374	PRAM1
222622_at	1.31263	0.000810537	0.0220198	PGP
219818_s_at	1.03328	0.000808274	0.0220198	GPATCH1
202686_s_at	-1.2288	0.000809427	0.0220198	AXL
204606_at	-2.1832	0.000809819	0.0220198	CCL21
201252_at	1.16915	0.000806437	0.0220189	PSMC4
208869_s_at	-1.11147	0.000803407	0.0219638	GABARAPL1
202081_at	-1.31753	0.00079997	0.0218975	IER2
202220_at	1.21191	0.00079643	0.0218282	KIAA0907
244088_at	1.48121	0.000791856	0.0217304	AP000230.1
238665_at	1.26188	0.000788446	0.0216643	ZNF865
1562965_at	1.3567	0.000786299	0.0216425	LOC101927095
207392_x_at	-2.15241	0.000785025	0.0216425	UGT2B15
213664_at	-2.29577	0.000784568	0.0216425	SLC1A1
220075_s_at	-3.0655	0.000786655	0.0216425	CDHR5
34868_at	1.07175	0.000780197	0.0216276	SMG5
210243_s_at	1.05365	0.000782118	0.0216276	B4GALT3
214133_at	-1.25435	0.000781165	0.0216276	MUC6
230329_s_at	-1.27572	0.000781493	0.0216276	NUDT6
216320_x_at	-1.16436	0.00077658	0.0216125	MST1
205799_s_at	-1.95596	0.000774152	0.0215726	SLC3A1
223171_at	1.08708	0.000772045	0.0215417	DYM
218935_at	-1.13967	0.000771918	0.0215417	EHD3
228069_at	1.33516	0.000766149	0.0214324	MTFR2
206557_at	1.87883	0.000760334	0.0213137	ZNF702P
1561034_at	1.57168	0.000760922	0.0213137	RP11-510C10.2
224746_at	1.16429	0.000759749	0.0213137	KIAA1522
229649_at	2.20874	0.000756974	0.0212857	NRXN3
203276_at	1.22394	0.000744836	0.0209716	LMNB1
201874_at	1.23172	0.000743166	0.0209519	MPZL1
236336_at	1.8759	0.000741713	0.0209382	BOLA3-AS1
210058_at	1.24836	0.000741218	0.0209382	MAPK13
227920_at	1.07416	0.000740901	0.0209382	BEND3
224913_s_at	1.03937	0.000740482	0.0209382	TIMM50
204438_at	-1.61264	0.000740569	0.0209382	MRC1
225300_at	1.04194	0.000736196	0.0209188	KNSTRN
1554459_s_at	-2.84915	0.000735012	0.0209126	CFHR3
229661_at	1.87893	0.000733202	0.0208885	SALL4
201672_s_at	1.12151	0.00073103	0.0208541	USP14
213306_at	-1.35081	0.0007251	0.0207122	MPDZ
1564471_at	1.75786	0.000722336	0.0206876	LOC100130815
201310_s_at	1.47419	0.000722007	0.0206876	NREP
210327_s_at	-1.63492	0.000723281	0.0206876	AGXT
201342_at	1.11948	0.000720117	0.020679	SNRPC
218187_s_at	1.04339	0.000718503	0.0206601	C8orf33
228008_at	1.32511	0.000712313	0.0205093	ARID3A
205700_at	-2.01986	0.000709005	0.0204412	HSD17B6
232707_at	2.33012	0.000705482	0.0203842	ISX
235425_at	1.63469	0.000706085	0.0203842	SGOL2
205612_at	-1.43939	0.000702948	0.0203479	MMRN1
219478_at	-2.01758	0.000702584	0.0203479	WFDC1
219294_at	1.30042	0.000693375	0.0202228	CENPQ
213320_at	1.04258	0.00069618	0.0202228	PRMT3
200936_at	1.04018	0.000695238	0.0202228	RPL8
212494_at	-1.17134	0.000694131	0.0202228	TENC1
230076_at	-1.36754	0.000694363	0.0202228	PITPNM3
204231_s_at	-1.40292	0.000692882	0.0202228	FAAH
202465_at	-1.52624	0.000696758	0.0202228	PCOLCE
219493_at	1.67002	0.000690144	0.0202206	SHCBP1
231398_at	-1.79554	0.000687451	0.020169	SLC22A7
205342_s_at	2.40471	0.00068582	0.0201607	SULT1C2
209795_at	-1.59784	0.000686237	0.0201607	CD69
52940_at	-1.31593	0.000676478	0.019928	SIGIRR
200750_s_at	1.27741	0.000673637	0.0198714	RAN
227226_at	1.4867	0.000671528	0.0198362	MRAP2
205073_at	-1.26727	0.000660328	0.0195365	CYP2J2
206496_at	-2.51788	0.00066048	0.0195365	FMO3
219010_at	1.76475	0.000657429	0.0194995	C1orf106
207383_s_at	1.66068	0.000656133	0.0194995	RHBDL1
204748_at	-2.31449	0.000656629	0.0194995	PTGS2
231772_x_at	1.62769	0.000650857	0.0193843	CENPH
225933_at	1.14579	0.000650758	0.0193843	CCDC137
1553296_at	-1.71502	0.000650274	0.0193843	GPR128
1554572_a_at	1.27824	0.000647759	0.0193719	SUV39H2
229596_at	-1.68162	0.000642633	0.0192452	AMDHD1
202847_at	-1.3695	0.000640013	0.0191933	PCK2
225217_s_at	1.09117	0.000637476	0.0191437	BRPF3
206524_at	1.72855	0.000635612	0.0191143	T
212186_at	1.4244	0.000635175	0.0191143	ACACA
209160_at	1.35563	0.000632301	0.0190708	AKR1C3
209382_at	1.34627	0.000632405	0.0190708	POLR3C
203758_at	-1.28306	0.000631342	0.0190708	CTSO
204728_s_at	1.49863	0.000626792	0.0189808	WDHD1
219508_at	1.33646	0.000619335	0.0187813	GCNT3
202366_at	-1.07419	0.000615781	0.0187461	ACADS
226597_at	-1.56215	0.000615633	0.0187461	REEP6
228293_at	-1.63327	0.000616566	0.0187461	DEPDC7
209687_at	-1.91577	0.000617059	0.0187461	CXCL12
206070_s_at	-2.0979	0.000616081	0.0187461	EPHA3
203914_x_at	-2.64071	0.00061731	0.0187461	HPGD
206000_at	2.85923	0.000611616	0.0187308	MEP1A
216379_x_at	1.92496	0.000610219	0.0187308	CD24
203645_s_at	-1.33564	0.000607634	0.0187308	CD163
227336_at	-1.43722	0.000611387	0.0187308	DTX1
1559033_at	-1.54109	0.000610335	0.0187308	LINC01018
205249_at	-1.76803	0.000607968	0.0187308	EGR2
207409_at	-2.33868	0.000609015	0.0187308	LECT2
203064_s_at	1.05403	0.000594173	0.0183786	FOXK2
223156_at	1.25692	0.000590258	0.0182836	MRPS23
1554408_a_at	1.67487	0.000585059	0.0181631	TK1
225516_at	-1.83748	0.000585529	0.0181631	SLC7A2
208576_s_at	1.86291	0.000581512	0.0180904	HIST1H3B
225285_at	1.6403	0.000578394	0.0180904	BCAT1
235322_at	1.4076	0.000580275	0.0180904	CTC-459F4.3
228920_at	1.15911	0.000581149	0.0180904	ZNF260
205754_at	-1.36973	0.000577243	0.0180904	F2
209368_at	-2.06245	0.000579762	0.0180904	EPHX2
213131_at	-2.24171	0.000580514	0.0180904	OLFM1
230149_at	1.66221	0.000568484	0.0178863	RP11-700J17.2
216259_at	-1.04826	0.000569169	0.0178863	LOC100506699
208837_at	1.40046	0.000567507	0.017886	TMED3
224467_s_at	1.07101	0.000566169	0.0178698	PDCD2L
201774_s_at	1.33623	0.000562304	0.0177737	NCAPD2
227872_at	1.80323	0.00055543	0.0175821	POLR3A
202737_s_at	1.29137	0.000553529	0.017572	LSM4
206697_s_at	-1.32161	0.000554297	0.017572	HP
201584_s_at	1.29569	0.000549726	0.0174921	DDX39A
226745_at	-1.36752	0.00054895	0.0174921	CYP4V2
201473_at	-1.41034	0.000550163	0.0174921	JUNB
202344_at	1.3617	0.000547565	0.0174865	HSF1
226303_at	-1.32423	0.000547	0.0174865	PGM5
219512_at	1.10831	0.000540723	0.0173191	DSN1
226197_at	-1.79996	0.000537878	0.0172535	AR
212062_at	1.24277	0.000534434	0.0171685	ATP9A
201664_at	1.38649	0.000529406	0.0170322	SMC4
228906_at	1.48939	0.000525904	0.0169448	TET1
210888_s_at	-1.40841	0.000525775	0.0169448	ITIH1
218804_at	-1.88537	0.000513725	0.0166017	ANO1
203046_s_at	1.01056	0.000511685	0.0165605	TIMELESS
219708_at	1.4528	0.000509192	0.0165449	NT5M
226233_at	1.10497	0.000509831	0.0165449	B3GALNT2
219281_at	-1.29188	0.000510437	0.0165449	MSRA
205024_s_at	1.54791	0.000499157	0.0162523	RAD51
203160_s_at	1.13192	0.00049771	0.0162296	RNF8
219880_at	1.49313	0.0004939	0.0161296	CTC-338M12.4
204271_s_at	-1.17301	0.000491284	0.0160684	EDNRB
228494_at	1.64517	0.000489599	0.0160375	PPP1R9A
202161_at	1.38726	0.000488762	0.0160344	PKN1
224513_s_at	1.38474	0.000485926	0.0159655	UBQLN4
203029_s_at	-1.99535	0.000481141	0.0158323	PTPRN2
219054_at	-1.13811	0.000477415	0.0157336	NPR3
224818_at	1.09839	0.000475294	0.0156876	SORT1
222116_s_at	1.28737	0.000473259	0.0156443	TBC1D16
218229_s_at	1.20263	0.000472431	0.0156408	POGK
223993_s_at	1.18626	0.000469149	0.0155559	CNIH4
223280_x_at	-1.6086	0.000467601	0.0155284	MS4A6A
226228_at	-2.12914	0.000464445	0.0154473	AQP4
208368_s_at	1.83897	0.000463479	0.0154388	BRCA2
214478_at	-1.90733	0.000459487	0.0153295	SPP2
227103_s_at	1.31661	0.000454638	0.0151911	ECE2
226059_at	1.93251	0.000453307	0.01519	TOMM40L
239093_at	-1.52192	0.000453904	0.01519	HOGA1
1560853_x_at	1.79185	0.000451883	0.0151693	ZNF826P
221529_s_at	1.3417	0.000451212	0.0151693	PLVAP
225524_at	-1.33575	0.00045046	0.0151685	ANTXR2
220755_s_at	1.41379	0.000447791	0.0151021	C6orf48
239625_at	1.50591	0.000446465	0.0150828	RP11-1109F11.3
210827_s_at	1.11514	0.000446521	0.0150828	ELF3
205830_at	1.96605	0.000444855	0.0150735	CLGN
227933_at	1.93027	0.000443921	0.0150655	LINGO1
205345_at	1.64278	0.00044392	0.0150655	BARD1
225739_at	1.21655	0.000439546	0.0149639	RAB11FIP4
203547_at	-1.38824	0.000435724	0.0148572	CD4
218544_s_at	-1.28817	0.000432227	0.0147845	RCL1
232224_at	-1.24289	0.000431165	0.0147715	MASP1
210751_s_at	-1.44143	0.000427188	0.01466	RGN
228844_at	-1.89482	0.000427235	0.01466	SLC13A5
205713_s_at	1.46487	0.000425816	0.0146578	COMP
207820_at	-1.50769	0.000424383	0.0146318	ADH1A
205881_at	1.57322	0.000421665	0.0145612	ZNF74
218983_at	-1.48366	0.000421051	0.0145612	C1RL
226487_at	1.87406	0.000418626	0.0145026	FAM222A
200632_s_at	1.6019	0.000412628	0.0143177	NDRG1
228903_at	-1.96853	0.00040936	0.0142271	CES4A
1568629_s_at	1.42785	0.00040487	0.0140936	PIK3R2
205449_at	1.65808	0.000402008	0.0140165	SAC3D1
235931_at	1.56915	0.000398589	0.0139198	METTL21A
218818_at	1.52985	0.000398125	0.0139198	FHL3
220070_at	-1.398	0.000397455	0.0139198	KDM8
204127_at	1.37403	0.000396101	0.0139001	RFC3
201841_s_at	1.41321	0.000394175	0.0138775	HSPB1
202556_s_at	1.08905	0.000393119	0.0138629	MCRS1
236141_at	-2.28728	0.000392214	0.0138535	HAND2-AS1
204457_s_at	-2.18198	0.000391291	0.0138435	GAS1
214043_at	-1.66291	0.000389846	0.013815	PTPRD
209617_s_at	1.33513	0.000386986	0.0137361	CTNND2
201896_s_at	1.64356	0.000385568	0.0137237	PSRC1
243110_x_at	-3.14858	0.000386003	0.0137237	NPW
242348_at	2.27327	0.000380669	0.0136242	FAM19A4
235572_at	2.1632	0.000381867	0.0136242	SPC24
209567_at	1.36163	0.000380848	0.0136242	RRS1
218843_at	-1.92883	0.000381379	0.0136242	FNDC4
231982_at	-2.5862	0.000381946	0.0136242	SMIM24
225311_at	-1.20103	0.000378127	0.0136	IVD
212592_at	-2.79462	0.000373537	0.0134573	IGJ
228504_at	-2.31479	0.00037247	0.0134412	SCN7A
229396_at	1.84255	0.000369397	0.0133525	OVOL1
201112_s_at	1.16865	0.000366265	0.0132615	CSE1L
209774_x_at	-2.409	0.000364583	0.0132227	CXCL2
204688_at	1.3837	0.00036186	0.0131459	SGCE
201710_at	2.23225	0.000356524	0.0130581	MYBL2
219215_s_at	1.8203	0.000358303	0.0130581	SLC39A4
205034_at	1.80984	0.000358838	0.0130581	CCNE2
241729_at	1.78658	0.000358517	0.0130581	DOK6
225676_s_at	1.5764	0.000355805	0.0130581	DCAF13
201968_s_at	-1.35205	0.000357856	0.0130581	PGM1
207256_at	-1.66389	0.000358009	0.0130581	MBL2
206913_at	-1.76799	0.000356744	0.0130581	BAAT
219427_at	-1.20328	0.000353342	0.0130333	FAT4
238681_at	1.35412	0.000350709	0.0129583	GDPD1
222036_s_at	1.04569	0.000349616	0.01294	MCM4
219985_at	-1.54339	0.000348461	0.0129193	HS3ST3A1
227084_at	1.6956	0.000347652	0.0129114	DTNA
202806_at	2.10725	0.00034552	0.0128543	DBN1
201764_at	1.22794	0.000344134	0.0128248	TMEM106C
218595_s_at	1.21003	0.000343152	0.0128248	HEATR1
201378_s_at	1.20168	0.000343229	0.0128248	UBAP2L
219076_s_at	-1.22554	0.00034381	0.0128248	PXMP2
229084_at	-1.78612	0.000338781	0.0127135	CNTN4
220005_at	-1.89012	0.000338801	0.0127135	P2RY13
205085_at	1.72241	0.000335944	0.0126502	ORC1
203744_at	1.17117	0.000333654	0.0125859	HMGB3
1569616_at	-1.45302	0.000332754	0.0125738	GMNC
203550_s_at	1.16857	0.000331232	0.0125382	FAM189B
206385_s_at	-2.04479	0.000330389	0.0125282	ANK3
224367_at	1.90258	0.000323922	0.0124115	BEX2
210854_x_at	1.87769	0.000325054	0.0124115	SLC6A8
208059_at	1.72706	0.000322792	0.0124115	CCR8
209421_at	1.62787	0.000324073	0.0124115	MSH2
202240_at	1.39708	0.000326404	0.0124115	PLK1
206316_s_at	1.36769	0.000324606	0.0124115	KNTC1
211609_x_at	1.34911	0.000325814	0.0124115	PSMD4
209054_s_at	1.17099	0.000316041	0.0121977	WHSC1
205047_s_at	2.0836	0.000309456	0.0119649	ASNS
209165_at	1.06357	0.000303944	0.011792	AATF
218931_at	-1.22004	0.000304439	0.011792	RAB17
227554_at	-1.35458	0.000300036	0.0116632	MAGI2-AS3
220786_s_at	-1.79644	0.000299631	0.0116632	SLC38A4
224695_at	1.22417	0.000298534	0.0116466	CNOT11
207589_at	-2.08446	0.000297321	0.0116202	ADRA1B
242541_at	-1.55179	0.000291752	0.0114248	ABCA9
232481_s_at	-1.71123	0.000291793	0.0114248	SLITRK6
235434_at	1.43542	0.000290541	0.0114171	CCDC134
242093_at	-1.73608	0.000288479	0.0113566	SYTL5
203549_s_at	1.76449	0.000285185	0.0112474	LPL
226225_at	-1.96975	0.000284651	0.0112468	MCC
213247_at	-1.90883	0.000282565	0.0111848	SVEP1
227943_at	1.55405	0.000281745	0.0111728	RP11-196G18.24
205107_s_at	1.49442	0.000281122	0.0111685	EFNA4
217755_at	1.31785	0.000280847	0.0111685	HN1
209218_at	2.02332	0.000279887	0.0111604	SQLE
204787_at	-1.67452	0.000278467	0.0111243	VSIG4
229796_at	1.99709	0.000277274	0.0110971	SIX4
218741_at	2.46651	0.000276323	0.0110795	CENPM
206052_s_at	1.26551	0.000276219	0.0110795	SLBP
204844_at	-1.69765	0.000275468	0.0110795	ENPEP
229019_at	-2.23348	0.000275805	0.0110795	ZNF385B
229831_at	-2.09011	0.00027029	0.0109185	CNTN3
1556316_s_at	2.38174	0.000267998	0.010851	LOC284889
232849_at	1.71021	0.000268117	0.010851	LOC100128988
225427_s_at	1.20142	0.000266277	0.010817	APOA1BP
241994_at	-2.64847	0.000263032	0.0107052	XDH
221188_s_at	-1.45136	0.000260491	0.0106218	CIDEB
223930_at	1.19427	0.000254813	0.0104098	RP11-533E19.7
222433_at	1.61049	0.000254004	0.0103964	ENAH
214022_s_at	-1.43121	0.000253602	0.0103964	IFITM1
242680_at	-2.08105	0.000252675	0.0103813	AVPR1A
1555278_a_at	1.37602	0.000251343	0.0103462	CKAP5
213088_s_at	1.20518	0.000251026	0.0103462	DNAJC9
211442_x_at	-1.56101	0.000249422	0.0103063	CYP3A43
229610_at	1.9702	0.000248414	0.0102843	CKAP2L
203790_s_at	-1.75484	0.00024546	0.0101814	HRSP12
217973_at	-1.64041	0.000242759	0.0100887	DCXR
207558_s_at	1.89871	0.000242279	0.0100881	PITX2
204776_at	1.61274	0.000240978	0.0100533	THBS4
230876_at	2.09344	0.000236871	0.00990101	ZNF883
208659_at	1.19301	0.000235268	0.00985306	CLIC1
235176_at	1.4758	0.000227699	0.00955455	ZFP82
221258_s_at	2.07572	0.000227115	0.00954854	KIF18A
208562_s_at	-1.88402	0.000225755	0.00950983	ABCC9
206119_at	-2.23062	0.000223699	0.0094416	BHMT
242463_x_at	1.44629	0.000220987	0.00934534	ZNF600
223660_at	-1.91906	0.000219223	0.00928887	ADORA3
202145_at	-1.54598	0.000218517	0.00927712	LY6E
223274_at	1.63815	0.000217553	0.00925435	TCF19
206140_at	-1.86219	0.000217192	0.00925435	LHX2
205582_s_at	-2.21466	0.000216692	0.00925405	GGT5
238756_at	1.92711	0.000213795	0.00914841	GAS2L3
208113_x_at	1.19991	0.000213409	0.00914841	PABPC3
224428_s_at	2.49854	0.000211849	0.00910111	CDCA7
228207_at	1.3148	0.000210714	0.00908496	LOC100499489
217897_at	-1.09241	0.000211054	0.00908496	FXYD6
206068_s_at	-2.72435	0.000210272	0.00908496	ACADL
201592_at	1.24277	0.000209415	0.00906852	EIF3H
214146_s_at	-2.74977	0.000208918	0.00906511	PPBP
232336_at	1.34599	0.000207298	0.00901287	ZSWIM5
201897_s_at	1.42556	0.000205171	0.00893836	CKS1B
207690_at	1.62225	0.000203707	0.00892226	ALX3
235199_at	-1.32675	0.000204023	0.00892226	RNF125
209866_s_at	-1.98739	0.000204389	0.00892226	LPHN3
224244_s_at	-2.42312	0.000204388	0.00892226	APOA5
203878_s_at	2.26922	0.000201752	0.00887873	MMP11
206024_at	-2.43355	0.000200946	0.00886128	HPD
213478_at	-1.83619	0.000200161	0.00884468	KAZN
57516_at	1.17325	0.000199523	0.0088345	ZNF764
222662_at	-1.9857	0.000197946	0.00878262	PPP1R3B
219502_at	1.23981	0.000196493	0.00873608	NEIL3
213974_at	-1.62455	0.000196176	0.00873608	ADAMTSL3
208496_x_at	1.25715	0.000194795	0.0087134	HIST1H3G
229777_at	-2.00363	0.000195178	0.0087134	CLRN3
242260_at	2.2707	0.000192544	0.00863139	MATR3
230109_at	-1.8924	0.000191573	0.00860567	PDE7B
206030_at	-2.4519	0.000190914	0.00859392	ASPA
1568596_a_at	1.49227	0.000187682	0.00846602	TROAP
205774_at	-1.81285	0.000187189	0.00846141	F12
1557418_at	2.13786	0.000185518	0.00840341	ACSL4
202882_x_at	1.15876	0.00018476	0.00840341	NOL7
220186_s_at	-1.29279	0.000184637	0.00840341	CDHR2
212724_at	-1.66902	0.00018502	0.00840341	RND3
220224_at	-1.97114	0.000185346	0.00840341	HAO1
202144_s_at	1.1676	0.000183499	0.00839982	ADSL
33494_at	-1.77335	0.000183375	0.00839982	ETFDH
200771_at	1.33282	0.000181322	0.00833541	LAMC1
222740_at	1.7033	0.000179099	0.00825077	ATAD2
226319_s_at	1.14613	0.000179	0.00825077	ALYREF
226492_at	-1.45303	0.000178025	0.00823631	SEMA6D
219873_at	-1.46026	0.000177628	0.00823631	COLEC11
209374_s_at	-2.57476	0.000177931	0.00823631	IGHM
218252_at	2.00068	0.00017577	0.00818444	CKAP2
227801_at	1.91919	0.000172364	0.00805698	TRIM59
200999_s_at	1.52608	0.000171955	0.00805698	CKAP4
202326_at	1.30327	0.000172302	0.00805698	EHMT2
205756_s_at	-1.61065	0.00017266	0.00805698	F8
215506_s_at	-2.29655	0.000168652	0.00793837	DIRAS3
206918_s_at	1.10782	0.000167142	0.00788446	CPNE1
209977_at	-1.38631	0.000164532	0.00782544	PLG
219803_at	-1.64549	0.00016469	0.00782544	ANGPTL3
209459_s_at	-1.76541	0.00016513	0.00782544	ABAT
207330_at	-2.14972	0.00016553	0.00782544	PZP
1568638_a_at	-2.41145	0.000165176	0.00782544	IDO2
225681_at	2.96013	0.000161552	0.00772169	CTHRC1
236805_at	1.89774	0.000160782	0.00771745	STKLD1
214804_at	1.64697	0.000161107	0.00771745	CENPI
227081_at	-2.48109	0.00016015	0.0077057	DNALI1
205259_at	-2.08625	0.000159375	0.00768548	NR3C2
218434_s_at	1.31118	0.000158265	0.00765435	AACS
208471_at	-2.14005	0.000158376	0.00765435	HPR
235885_at	-1.93452	0.00015645	0.00759517	P2RY12
204078_at	2.10481	0.000155952	0.00758803	LEPREL4
201577_at	1.5384	0.000155124	0.00756474	NME1
207219_at	2.49876	0.000152095	0.00743378	ZFP69B
205042_at	-1.52382	0.000151564	0.00742456	GNE
208511_at	2.16445	0.000150549	0.00739156	PTTG3P
230608_at	1.40176	0.000150067	0.00739156	TSACC
217504_at	-2.05802	0.000150388	0.00739156	ABCA6
232065_x_at	1.43296	0.000147176	0.00727545	CENPL
213706_at	-2.24316	0.000144326	0.0071509	GPD1
223311_s_at	1.12706	0.000140393	0.00697219	MTA3
1567298_at	-1.72459	0.000140397	0.00697219	OR13C4
221521_s_at	1.6703	0.000136606	0.00682446	GINS2
207560_at	-1.31635	0.000136792	0.00682446	SLC28A1
205749_at	-2.46495	0.000136349	0.00682446	CYP1A1
229819_at	-1.6056	0.000135107	0.00678735	A1BG
230081_at	-1.8692	0.000133213	0.00670773	PLCXD3
214431_at	1.2579	0.000132201	0.00667228	GMPS
204033_at	2.00751	0.000130993	0.00662676	TRIP13
1552569_a_at	-2.78955	0.000130303	0.00660733	RTP3
218657_at	1.91942	0.000129134	0.0065634	RAPGEFL1
207076_s_at	-1.64243	0.000129119	0.0065634	ASS1
218541_s_at	-1.84498	0.000127873	0.00652999	C8orf4
214864_s_at	-1.32844	0.000126392	0.0064696	GRHPR
203612_at	2.0117	0.00012576	0.00645252	BYSL
217013_at	-1.97667	0.000124627	0.00640958	AZGP1P1
209821_at	-2.0124	0.000123595	0.00637163	IL33
221922_at	1.82666	0.000123004	0.00635627	GPSM2
223642_at	2.41656	0.000121655	0.00630161	ZIC2
242496_at	-2.54117	0.000120469	0.00625516	ART4
205909_at	1.49201	0.000119553	0.00622248	POLE2
206550_s_at	1.29445	0.000114101	0.00596743	NUP155
210549_s_at	-1.97449	0.000112549	0.00590052	CCL23
201743_at	-1.53693	0.000111986	0.00588525	CD14
206481_s_at	-1.64534	0.000111519	0.00587498	LDB2
210889_s_at	-1.86992	0.000110146	0.00581677	FCGR2B
201930_at	1.46948	0.000109588	0.00580992	MCM6
207977_s_at	-1.32321	0.000109748	0.00580992	DPT
205789_at	-1.94769	0.0001086	0.00577739	CD1D
203908_at	-2.21882	0.000106692	0.00568988	SLC4A4
228821_at	-2.15678	0.000105404	0.00563508	ST6GAL2
203500_at	-1.37731	0.000104654	0.00560882	GCDH
206756_at	-1.79957	0.000103965	0.00558574	CHST7
217127_at	-2.47397	0.000103443	0.00557153	CTH
210095_s_at	-1.44324	0.000102951	0.00555885	IGFBP3
205141_at	-1.32964	9.81e-05	0.00531058	ANG
220108_at	-1.35908	9.81e-05	0.00531058	GNA14
231882_at	1.60197	9.67e-05	0.00526213	AP000525.9
208747_s_at	-1.32405	9.66e-05	0.00526213	C1S
201587_s_at	1.06524	9.61e-05	0.00525403	IRAK1
220975_s_at	-1.16232	9.57e-05	0.00524606	C1QTNF1
220060_s_at	1.7904	9.53e-05	0.0052385	PARPBP
213194_at	2.0321	9.28e-05	0.00511111	ROBO1
202246_s_at	1.28768	9.21e-05	0.00508791	CDK4
235736_at	1.98854	9.17e-05	0.00508012	SMKR1
203145_at	1.36826	8.88e-05	0.00493173	SPAG5
211726_s_at	-2.44926	8.82e-05	0.00490659	FMO2
218115_at	1.45571	8.65e-05	0.00482844	ASF1B
221848_at	-1.634	8.55e-05	0.00478482	ZGPAT
204993_at	1.98208	8.4e-05	0.0047289	GNAZ
232636_at	1.75059	8.42e-05	0.0047289	SLITRK4
232090_at	-2.61002	8.43e-05	0.0047289	DNM3OS
218788_s_at	1.60914	8.26e-05	0.00469198	SMYD3
201681_s_at	1.41912	8.27e-05	0.00469198	DLG5
218552_at	-1.37504	8.23e-05	0.00469198	ECHDC2
200986_at	-1.43041	8.29e-05	0.00469198	SERPING1
231678_s_at	-2.32801	8.3e-05	0.00469198	ADH4
235296_at	1.4982	8.17e-05	0.00467977	EIF5A2
238021_s_at	2.92219	8.14e-05	0.00467551	CRNDE
226586_at	1.69602	8.12e-05	0.00467551	ANKS6
1552440_at	-1.84332	8.1e-05	0.00467551	GPR182
202261_at	1.37526	8.01e-05	0.00463883	VPS72
213222_at	1.68186	7.89e-05	0.00458272	PLCB1
202846_s_at	1.10961	7.79e-05	0.00453255	PIGC
202286_s_at	-2.21419	7.71e-05	0.00449738	TACSTD2
226456_at	2.38439	7.68e-05	0.00449377	RMI2
213634_s_at	1.77065	7.64e-05	0.0044833	TRMU
226839_at	1.22527	7.63e-05	0.0044833	NR2C2AP
219990_at	2.03289	7.57e-05	0.0044653	E2F8
207584_at	-2.28177	7.57e-05	0.0044653	LPA
219306_at	2.2414	7.41e-05	0.0044632	KIF15
203358_s_at	1.88919	7.52e-05	0.0044632	EZH2
201088_at	1.84892	7.52e-05	0.0044632	KPNA2
228191_at	1.83133	7.48e-05	0.0044632	FLVCR1
218061_at	1.11587	7.42e-05	0.0044632	MEA1
228653_at	-1.85789	7.46e-05	0.0044632	SAMD5
206840_at	-2.54927	7.4e-05	0.0044632	AFM
211224_s_at	-2.58332	7.5e-05	0.0044632	ABCB11
212713_at	-2.62631	7.5e-05	0.0044632	MFAP4
212094_at	3.01239	7.31e-05	0.00444504	PEG10
225275_at	1.79433	7.16e-05	0.00436509	EDIL3
209656_s_at	-1.73946	7.08e-05	0.00433163	TMEM47
223389_s_at	1.86139	7.03e-05	0.004309	ZNF581
208383_s_at	-2.17977	6.91e-05	0.00425263	PCK1
206610_s_at	-1.64362	6.78e-05	0.00418422	F11
201892_s_at	1.44563	6.76e-05	0.00417898	IMPDH2
228523_at	3.22505	6.73e-05	0.00417597	NANOS1
208926_at	1.59641	6.61e-05	0.00412438	NEU1
1555250_a_at	-1.80496	6.6e-05	0.00412438	CPEB3
1563610_at	-2.3805	6.63e-05	0.00412438	LOC157273
224320_s_at	1.60683	6.41e-05	0.0040219	MCM8
213869_x_at	1.30542	6.39e-05	0.0040219	THY1
201809_s_at	-1.72898	6.38e-05	0.0040219	ENG
1552910_at	-2.20241	6.38e-05	0.0040219	SIGLEC11
206354_at	-2.51716	6.39e-05	0.0040219	SLCO1B3
227679_at	1.72954	6.25e-05	0.00398181	HDAC11
206753_at	-2.70192	6.24e-05	0.00398181	RDH16
231310_at	2.73988	6.15e-05	0.00393745	TRIM71
218308_at	2.2712	5.98e-05	0.00384366	TACC3
212554_at	2.33894	5.94e-05	0.00382566	CAP2
204441_s_at	1.73417	5.74e-05	0.00370764	POLA2
226980_at	2.45583	5.63e-05	0.00365008	DEPDC1B
1566968_at	-2.15453	5.63e-05	0.00365008	SPRY4-IT1
1569846_at	2.05909	5.6e-05	0.00365007	CTD-2251F13.1
202973_x_at	-1.87834	5.5e-05	0.00360071	FAM13A
204931_at	-1.60407	5.42e-05	0.00355857	TCF21
219060_at	1.48984	5.4e-05	0.00355467	WDYHV1
221591_s_at	2.01674	5.37e-05	0.00354612	FAM64A
1565786_x_at	1.38353	5.35e-05	0.0035398	FLJ45482
212022_s_at	1.68463	5.28e-05	0.00350941	MKI67
219543_at	-2.03853	5.17e-05	0.00344403	PBLD
232878_at	-2.18853	5.1e-05	0.00341005	NR2F2-AS1
228186_s_at	-2.4497	5.09e-05	0.00341005	RSPO3
213355_at	-2.04084	5.01e-05	0.00336697	ST3GAL6
214142_at	-2.69013	4.97e-05	0.00335551	ZG16
219277_s_at	-2.28123	4.95e-05	0.00335055	OGDHL
215129_at	-1.84464	4.91e-05	0.00333169	PIK3C2G
203755_at	2.44379	4.78e-05	0.00325217	BUB1B
200052_s_at	1.576	4.69e-05	0.00320485	ILF2
209541_at	-2.15943	4.55e-05	0.00311607	IGF1
1553015_a_at	1.75478	4.52e-05	0.00310781	RECQL4
213820_s_at	-1.49314	4.41e-05	0.00303796	STARD5
204244_s_at	1.62778	4.39e-05	0.00303571	DBF4
222500_at	1.58564	4.31e-05	0.00299141	PPIL1
209800_at	-1.67904	4.23e-05	0.00294721	KRT16
203131_at	-2.64229	4.1e-05	0.002865	PDGFRA
226807_at	-1.45106	4.08e-05	0.0028609	ZFP1
235272_at	2.10715	4.07e-05	0.00286026	SBSN
209044_x_at	1.45057	4.04e-05	0.00285072	SF3B4
209696_at	-2.00042	4.04e-05	0.00285072	FBP1
220017_x_at	-2.12132	4.04e-05	0.00285072	CYP2C9
206210_s_at	-2.62858	4.03e-05	0.00285072	CETP
206424_at	-2.68707	3.99e-05	0.00285072	CYP26A1
228977_at	2.59065	3.92e-05	0.00281173	LOC729680
204134_at	-2.12406	3.92e-05	0.00281173	PDE2A
229476_s_at	-4.01272	3.9e-05	0.00281173	THRSP
210168_at	-2.29774	3.86e-05	0.00279441	C6
216237_s_at	1.52369	3.79e-05	0.00275236	MCM5
222474_s_at	1.35702	3.74e-05	0.00272963	TOMM22
209408_at	1.38581	3.67e-05	0.00269005	KIF2C
236652_at	-2.15597	3.67e-05	0.00269005	LOC149703
219728_at	-2.56887	3.68e-05	0.00269005	MYOT
205167_s_at	1.80751	3.59e-05	0.00265949	CDC25C
220429_at	-1.8618	3.6e-05	0.00265949	NDST3
212949_at	2.68979	3.41e-05	0.0025345	NCAPH
228116_at	2.44502	3.39e-05	0.00253037	LL22NC03-N14H11.1
204580_at	3.14743	3.26e-05	0.00245064	MMP12
201425_at	-1.61759	3.27e-05	0.00245064	ALDH2
223820_at	-2.2159	3.23e-05	0.00243509	RBP5
220061_at	-2.28017	3.2e-05	0.00242073	ACSM5
227350_at	1.86396	3.17e-05	0.00240644	HELLS
222640_at	1.42819	3.15e-05	0.00239907	DNMT3A
205813_s_at	-1.86065	3.1e-05	0.00237945	MAT1A
229229_at	-2.1499	3.11e-05	0.00237945	AGXT2
206410_at	-1.35045	3.06e-05	0.00235784	NR0B2
1553246_a_at	1.86755	3.05e-05	0.00235712	POMK
223593_at	-2.09254	3.04e-05	0.00235712	AADAT
207874_s_at	-2.93793	2.99e-05	0.00232845	CFHR4
202345_s_at	1.92329	2.97e-05	0.00232018	FABP5
208370_s_at	-2.12131	2.94e-05	0.00230947	RCAN1
221008_s_at	-2.33691	2.88e-05	0.00226501	ETNPPL
214719_at	-2.02176	2.75e-05	0.0021726	SLC46A3
211623_s_at	1.60797	2.69e-05	0.00213282	FBL
204483_at	-1.96639	2.55e-05	0.00203283	ENO3
214751_at	1.83556	2.51e-05	0.00200346	ZNF468
202503_s_at	2.31633	2.46e-05	0.00197554	KIAA0101
203120_at	1.68671	2.42e-05	0.00194386	TP53BP2
206979_at	-1.82313	2.41e-05	0.00194386	C8B
202107_s_at	1.84287	2.39e-05	0.00193869	MCM2
218717_s_at	-2.54193	2.36e-05	0.00192108	LEPREL1
201893_x_at	-2.60629	2.34e-05	0.00191556	DCN
205999_x_at	-2.58138	2.33e-05	0.00191256	CYP3A4
209612_s_at	-2.06899	2.29e-05	0.00188521	ADH1B
223530_at	1.61735	2.26e-05	0.00187043	TDRKH
221588_x_at	-1.9715	2.25e-05	0.00186942	ALDH6A1
205498_at	-2.29638	2.23e-05	0.00186007	GHR
208394_x_at	2.43941	2.21e-05	0.00185741	ESM1
205670_at	2.3349	2.22e-05	0.00185741	GAL3ST1
205326_at	-1.72439	2.22e-05	0.00185741	RAMP3
208696_at	1.4547	2.14e-05	0.00180843	CCT5
203509_at	-1.5482	2.12e-05	0.00179814	SORL1
215783_s_at	-1.56443	2.11e-05	0.00179814	ALPL
205728_at	-1.98058	2.1e-05	0.00179814	TENM1
206680_at	-2.18168	2.11e-05	0.00179814	CD5L
223307_at	2.00584	2.08e-05	0.00179378	CDCA3
232494_at	-2.79434	2.05e-05	0.00177939	CYP8B1
201555_at	1.61496	2.04e-05	0.00177034	MCM3
204301_at	-2.07633	2e-05	0.00174424	KBTBD11
238075_at	1.5702	1.93e-05	0.00169614	CHEK1
229331_at	-2.60957	1.92e-05	0.00168766	SPATA18
223316_at	-1.67864	1.9e-05	0.00167549	CCDC3
207621_s_at	-1.54977	1.88e-05	0.0016681	PEMT
238214_at	2.20694	1.86e-05	0.00166088	LRRC69
218039_at	1.98241	1.84e-05	0.00164656	NUSAP1
204444_at	2.54099	1.83e-05	0.00164185	KIF11
203022_at	1.44179	1.83e-05	0.00164185	RNASEH2A
225655_at	2.19429	1.8e-05	0.00163407	UHRF1
231140_at	-2.37944	1.79e-05	0.00162754	TPPP2
224458_at	2.05472	1.75e-05	0.00160032	TMEM246
203362_s_at	2.03889	1.72e-05	0.00158123	MAD2L1
204026_s_at	1.97101	1.72e-05	0.00158017	ZWINT
230602_at	-2.10078	1.68e-05	0.00155789	ACMSD
209891_at	2.02708	1.67e-05	0.00154844	SPC25
238447_at	-1.57354	1.6e-05	0.00149658	RBMS3
205339_at	1.36588	1.53e-05	0.00143677	STIL
209309_at	-1.8377	1.5e-05	0.00140756	AZGP1
202589_at	2.16928	1.49e-05	0.0014075	TYMS
208034_s_at	-1.91935	1.49e-05	0.0014075	PROZ
219230_at	-2.04932	1.42e-05	0.0013527	TMEM100
242817_at	-2.79196	1.41e-05	0.0013527	PGLYRP2
204603_at	1.99358	1.39e-05	0.00133522	EXO1
228776_at	1.84464	1.29e-05	0.00125036	GJC1
210452_x_at	-2.12758	1.28e-05	0.00124274	CYP4F2
208824_x_at	1.23701	1.27e-05	0.00123873	CDK16
1552280_at	-2.98282	1.24e-05	0.00121103	TIMD4
205436_s_at	1.46983	1.2e-05	0.00118326	H2AFX
230250_at	-1.75139	1.19e-05	0.00117733	PTPRB
213568_at	2.22251	1.16e-05	0.00115404	OSR2
210521_s_at	-2.47017	1.15e-05	0.00115182	FETUB
204768_s_at	1.53569	1.12e-05	0.00111954	FEN1
215712_s_at	-1.83468	1.12e-05	0.00111954	IGFALS
203434_s_at	-2.28416	1.11e-05	0.00111954	MME
219737_s_at	-2.41777	1.11e-05	0.00111954	PCDH9
213661_at	-2.3026	1.09e-05	0.001109	PAMR1
219410_at	-2.28298	1.07e-05	0.00110076	TMEM45A
219059_s_at	-2.38211	1.07e-05	0.00110076	LYVE1
235737_at	-2.45475	1.06e-05	0.00109848	TSLP
207185_at	-2.6013	1.05e-05	0.00109775	SLC10A1
202580_x_at	2.50959	1.05e-05	0.00109706	FOXM1
218883_s_at	1.82917	1.05e-05	0.00109706	CENPU
213695_at	-2.13054	1.02e-05	0.00108124	PON3
218585_s_at	2.61727	9.73e-06	0.00103293	DTL
205053_at	1.60776	9.68e-06	0.00103243	PRIM1
222958_s_at	2.59914	9.52e-06	0.00102048	DEPDC1
206727_at	-2.86224	9.51e-06	0.00102048	C9
1557226_a_at	-2.53055	9.18e-06	0.000993707	ASPG
224300_x_at	-1.66978	9.1e-06	0.000990014	FTCD
1560182_at	1.80059	9.05e-06	0.000989193	LOC101927066
227297_at	-1.73714	8.76e-06	0.000962733	ITGA9
217640_x_at	2.99295	8.65e-06	0.000956459	SKA1
205234_at	-2.23342	8.66e-06	0.000956459	SLC16A4
222848_at	2.26244	8.44e-06	0.000942405	CENPK
203820_s_at	3.60571	8.37e-06	0.000939343	IGF2BP3
212067_s_at	-2.03296	7.92e-06	0.000893515	C1R
202779_s_at	2.037	7.84e-06	0.000892201	UBE2S
205433_at	-2.69236	7.87e-06	0.000892201	BCHE
205695_at	-3.40028	7.19e-06	0.000823914	SDS
204146_at	2.4907	7.12e-06	0.000820032	RAD51AP1
219510_at	2.23527	7.01e-06	0.000811506	POLQ
218755_at	2.65422	6.86e-06	0.000798975	KIF20A
228055_at	-2.51873	6.79e-06	0.000795169	NAPSB
226661_at	1.84444	6.67e-06	0.000785186	CDCA2
213226_at	1.83157	6.61e-06	0.000781689	CCNA2
205858_at	-2.20149	6.46e-06	0.000768424	NGFR
216952_s_at	2.35505	6.19e-06	0.000741403	LMNB2
213175_s_at	1.57446	6.15e-06	0.000741403	SNRPB
206706_at	-1.97002	6.2e-06	0.000741403	NTF3
219105_x_at	1.92416	5.97e-06	0.00072624	ORC6
205363_at	-2.75776	5.74e-06	0.000704296	BBOX1
233604_at	-3.111	5.76e-06	0.000704296	FLJ22763
207165_at	2.60517	5.59e-06	0.00069165	HMMR
219787_s_at	2.71514	5.49e-06	0.00068279	ECT2
211303_x_at	-2.46847	5.42e-06	0.000677735	FOLH1B
242560_at	2.23532	5.35e-06	0.000673642	FANCD2
228868_x_at	2.18383	5.27e-06	0.000667433	CDT1
209642_at	3.33441	5.19e-06	0.000663818	BUB1
226846_at	-2.32081	5.21e-06	0.000663818	PHYHD1
203764_at	2.26739	5.03e-06	0.000647904	DLGAP5
1553062_at	-2.12518	4.98e-06	0.000647904	MOGAT1
219733_s_at	-2.24457	5.03e-06	0.000647904	SLC27A5
206262_at	-2.83266	4.92e-06	0.000644984	ADH1C
209680_s_at	2.98755	4.85e-06	0.000640928	KIFC1
204162_at	2.61005	4.8e-06	0.000640928	NDC80
210052_s_at	2.1801	4.84e-06	0.000640928	TPX2
225316_at	-3.17632	4.77e-06	0.000640928	MFSD2A
202870_s_at	2.51835	4.48e-06	0.000606867	CDC20
203228_at	1.77847	4.35e-06	0.000592793	PAFAH1B3
222039_at	2.41114	4.3e-06	0.000590855	KIF18B
212185_x_at	-2.40829	4.29e-06	0.000590855	MT2A
206287_s_at	-2.53596	4.31e-06	0.000590855	ITIH4
218847_at	2.52523	4.17e-06	0.00058251	IGF2BP2
206469_x_at	-2.008	4.08e-06	0.000574292	AKR7A3
210013_at	-2.09741	4.08e-06	0.000574292	HPX
204170_s_at	2.27605	3.96e-06	0.000565508	CKS2
204023_at	1.89469	3.97e-06	0.000565508	RFC4
205440_s_at	-2.70044	3.89e-06	0.000561819	NPY1R
209464_at	2.85272	3.86e-06	0.000561458	AURKB
206755_at	-2.72919	3.71e-06	0.00054326	CYP2B6
220148_at	-2.32804	3.64e-06	0.000535677	ALDH8A1
203967_at	2.27641	3.46e-06	0.000512668	CDC6
204709_s_at	3.23092	3.41e-06	0.000509061	KIF23
206074_s_at	1.84255	3.37e-06	0.000507307	HMGA1
206938_at	-2.56135	3.33e-06	0.000507307	SRD5A2
230577_at	-3.74293	3.36e-06	0.000507307	LINC00844
204641_at	2.65772	3.26e-06	0.000501291	NEK2
206345_s_at	-2.5149	3.11e-06	0.000481584	PON1
214039_s_at	1.95194	3.04e-06	0.000473972	LAPTM4B
204825_at	2.43109	2.96e-06	0.000467316	MELK
238018_at	-2.54249	2.98e-06	0.000467316	FAM150B
204955_at	-2.48319	2.56e-06	0.000408241	SRPX
208147_s_at	-2.69119	2.56e-06	0.000408241	CYP2C8
220446_s_at	-1.73605	2.37e-06	0.000383501	CHST4
220801_s_at	-3.19402	2.32e-06	0.000378092	HAO2
228338_at	2.09806	2.27e-06	0.000373792	COLCA2
213245_at	-1.94352	2.28e-06	0.000373792	ADCY1
206450_at	-2.59623	2.07e-06	0.000344753	DBH
207218_at	-2.65019	2.05e-06	0.000344502	F9
212859_x_at	-2.70389	1.95e-06	0.000329933	MT1E
241255_at	-3.11134	1.88e-06	0.000321142	CTNNA3
205627_at	-3.41055	1.84e-06	0.000316341	CDA
209773_s_at	2.59892	1.82e-06	0.000314719	RRM2
223381_at	3.721	1.78e-06	0.000311232	NUF2
206102_at	3.19483	1.77e-06	0.000311232	GINS1
218051_s_at	2.91665	1.77e-06	0.000311232	NT5DC2
218424_s_at	-1.93419	1.77e-06	0.000311232	STEAP3
229241_at	-1.72376	1.7e-06	0.000305958	LDHD
207027_at	-3.09863	1.66e-06	0.000302898	HGFAC
218009_s_at	2.50147	1.61e-06	0.000296326	PRC1
1559573_at	-2.7686	1.61e-06	0.000296326	LINC01093
225987_at	-2.16746	1.5e-06	0.000280301	STEAP4
218350_s_at	2.03313	1.48e-06	0.000279496	GMNN
209220_at	3.46722	1.43e-06	0.000272199	GPC3
206631_at	-2.27874	1.35e-06	0.000258061	PTGER2
218662_s_at	1.92396	1.3e-06	0.000251917	NCAPG
210328_at	-2.66817	1.24e-06	0.000242364	GNMT
226936_at	1.99352	1.2e-06	0.00023895	CENPW
237765_at	-2.49873	1.2e-06	0.00023895	SLC25A47
205225_at	-2.82373	1.21e-06	0.00023895	ESR1
210559_s_at	2.36822	1.08e-06	0.00021912	CDK1
227404_s_at	-2.36434	1.08e-06	0.00021912	EGR1
228728_at	-2.72456	1.01e-06	0.000209133	CPED1
207407_x_at	-2.11026	9.28e-07	0.000193264	CYP4A11
222077_s_at	2.10246	8.72e-07	0.000183329	RACGAP1
205943_at	-2.78831	8.4e-07	0.000178367	TDO2
223844_at	-1.73149	7.78e-07	0.000166881	ADAMTS13
220112_at	-1.94536	7.57e-07	0.000163866	ANKRD55
209714_s_at	2.4669	7.33e-07	0.000160245	CDKN3
203554_x_at	2.43835	7.12e-07	0.000160245	PTTG1
208079_s_at	2.1714	7.25e-07	0.000160245	AURKA
213832_at	-2.47672	7.26e-07	0.000160245	KCND3
217165_x_at	-3.25247	7.15e-07	0.000160245	MT1F
219148_at	2.9183	6.5e-07	0.000149684	PBK
209531_at	-2.33508	6.37e-07	0.000149684	GSTZ1
205984_at	-4.03322	6.44e-07	0.000149684	CRHBP
231691_at	-3.13313	5.91e-07	0.000140576	C3P1
207828_s_at	2.51603	5.83e-07	0.000140194	CENPF
232449_at	-2.96743	5.81e-07	0.000140194	BCO2
204822_at	3.50631	5.46e-07	0.000135789	TTK
222608_s_at	2.72891	5.34e-07	0.000135789	ANLN
1553977_a_at	-2.44038	5.52e-07	0.000135789	CYP39A1
211456_x_at	-2.94126	5.41e-07	0.000135789	MT1HL1
207718_x_at	-3.14049	5.08e-07	0.000135789	CYP2A7
223699_at	-3.61378	5.37e-07	0.000135789	CNDP1
206797_at	-4.34606	5.18e-07	0.000135789	NAT2
207201_s_at	-4.34692	5.29e-07	0.000135789	SLC22A1
214734_at	-1.9314	4.63e-07	0.00012525	EXPH5
208581_x_at	-2.69601	4.57e-07	0.00012525	MT1X
220794_at	-3.16753	4.28e-07	0.000118839	GREM2
225575_at	-2.53519	4.15e-07	0.000117667	LIFR
206461_x_at	-2.80193	4.18e-07	0.000117667	MT1H
201291_s_at	3.28941	4.05e-07	0.000116843	TOP2A
207420_at	-1.95198	4.02e-07	0.000116843	COLEC10
232428_at	-2.88625	3.87e-07	0.000114742	MOGAT2
211489_at	-2.43682	3.8e-07	0.000114297	ADRA1A
218355_at	2.87088	3.68e-07	0.000112308	KIF4A
210565_at	-2.18215	3.67e-07	0.000112308	GCGR
211138_s_at	-2.69235	3.62e-07	0.000112308	KMO
202992_at	-3.07014	3.29e-07	0.000104683	C7
219014_at	-2.59606	2.9e-07	9.44e-05	PLAC8
224061_at	-2.87947	2.84e-07	9.44e-05	INMT
220491_at	-3.2096	2.92e-07	9.44e-05	HAMP
207202_s_at	-2.68115	2.73e-07	9.32e-05	NR1I2
214621_at	-3.5738	2.75e-07	9.32e-05	GYS2
207102_at	-2.7952	2.66e-07	9.27e-05	AKR1D1
205046_at	3.13134	2.5e-07	9.03e-05	CENPE
205336_at	-2.49869	2.54e-07	9.03e-05	PVALB
217546_at	-4.41223	2.53e-07	9.03e-05	MT1M
213599_at	2.39496	2.42e-07	9.03e-05	OIP5
218918_at	-2.2763	2.2e-07	8.57e-05	MAN1C1
223784_at	-2.47576	2.26e-07	8.57e-05	TMEM27
241986_at	-3.52965	2.22e-07	8.57e-05	BMPER
205911_at	-1.78541	2.05e-07	8.23e-05	PTH1R
206305_s_at	-2.64157	2.01e-07	8.23e-05	C8A
230135_at	-2.75615	1.86e-07	8.08e-05	HHIP
210143_at	-2.89458	1.91e-07	8.08e-05	ANXA10
229641_at	-3.0063	1.87e-07	8.08e-05	CCBE1
222484_s_at	-4.37916	1.94e-07	8.08e-05	CXCL14
209035_at	2.30148	1.74e-07	7.87e-05	MDK
218726_at	3.60624	1.66e-07	7.65e-05	HJURP
1556185_a_at	-2.3397	1.64e-07	7.65e-05	CTB-167B5.2
209469_at	-2.78765	1.5e-07	7.23e-05	GPM6A
215689_s_at	-3.35408	1.48e-07	7.23e-05	SHBG
202095_s_at	3.01413	1.38e-07	7.01e-05	BIRC5
225687_at	2.11409	1.39e-07	7.01e-05	FAM83D
206898_at	-2.35696	1.31e-07	7.01e-05	CDH19
205404_at	-3.33748	1.36e-07	7.01e-05	HSD11B1
206541_at	-2.37874	1.14e-07	6.34e-05	KLKB1
223229_at	2.413	9.26e-08	5.36e-05	UBE2T
209365_s_at	-1.86889	9.4e-08	5.36e-05	ECM1
205819_at	-3.99937	9.26e-08	5.36e-05	MARCO
209960_at	-2.52313	7.17e-08	4.43e-05	HGF
222083_at	-4.09718	6.62e-08	4.22e-05	GLYAT
221520_s_at	3.31169	5.4e-08	3.55e-05	CDCA8
204745_x_at	-3.04531	5.38e-08	3.55e-05	MT1G
220116_at	-3.2992	5.38e-08	3.55e-05	KCNN2
202954_at	2.28866	4.39e-08	3.17e-05	UBE2C
223967_at	-2.96953	4.21e-08	3.14e-05	ANGPTL6
219918_s_at	3.27415	3.77e-08	2.94e-05	ASPM
224753_at	3.08098	3.57e-08	2.94e-05	CDCA5
220496_at	-3.5246	3.8e-08	2.94e-05	CLEC1B
204428_s_at	-3.76069	3.72e-08	2.94e-05	LCAT
218532_s_at	-2.65333	2.52e-08	2.37e-05	FAM134B
222943_at	-3.41444	2.63e-08	2.37e-05	GBA3
205531_s_at	-3.57152	2e-08	1.97e-05	GLS2
1494_f_at	-3.33148	1.77e-08	1.84e-05	CYP2A6
207804_s_at	-3.80938	1.78e-08	1.84e-05	FCN2
206380_s_at	-4.21404	1.67e-08	1.84e-05	CFP
231773_at	-2.99134	1.52e-08	1.82e-05	ANGPTL1
202705_at	2.52092	1.42e-08	1.81e-05	CCNB2
209189_at	-2.94346	1.23e-08	1.67e-05	FOS
207608_x_at	-3.48993	1.02e-08	1.54e-05	CYP1A2
207262_at	-3.59949	1.07e-08	1.54e-05	APOF
205554_s_at	-2.81858	8.98e-09	1.5e-05	DNASE1L3
202768_at	-4.2518	7.23e-09	1.3e-05	FOSB
214710_s_at	2.96128	3.82e-09	8.17e-06	CCNB1
220114_s_at	-2.52732	4.15e-09	8.17e-06	STAB2
205019_s_at	-3.43864	3.99e-09	8.17e-06	VIPR1
237350_at	-4.2332	3.49e-09	8.17e-06	TTC36
227654_at	-2.98449	2.33e-09	7.2e-06	FAM65C
205866_at	-3.81703	1.86e-09	6.7e-06	FCN3
204719_at	-3.60444	1.45e-09	6.27e-06	ABCA8
239380_at	-3.07666	8.37e-10	4.53e-06	C5orf27
230478_at	-3.46788	7.88e-10	4.53e-06	OIT3
1559065_a_at	-3.84892	1.7e-10	1.84e-06	CLEC4G
210481_s_at	-4.50449	2.1e-11	4.54e-07	CLEC4M
