# Supplementary material for: Multilevel data integration and molecular docking approach to systematically elucidate the underlying pharmacological mechanisms of Er-Zhi-Wan against hepatocellular carcinoma
Source: Aging (Albany NY). 2022 Nov 7;14(21):8783–804. doi: 10.18632/aging.204369 (PMC9699749; doi:10.18632/aging.204369)
Supplement: Supplementary File 3 [file aging-14-204369-s003.xlsx]

## Sheet: Sheet1
Supplementary File 3. Potential targets of 19 active compounds in EZW were identified from two target prediction databases, HERB and SwissTargetPrediction.
Ecliptae Herba							Fructus Ligustri Lucidi
Ingredients	HERB database	SwissTargetPrediction					Ingredients	HERB database	SwissTargetPrediction
	Gene symbol	Common name	Probability*					Gene symbol	Common name	Probability*
Linarin	NA	TNF	0.271348				beta-sitosterol	BAX	HMGCR	0.680955
		AKR1B1	0.244387					BCL2	CYP51A1	0.680955
		IL2	0.190313					CASP3	AR	0.656004
		ADORA1	0.15429					CASP8	NPC1L1	0.647647
		XDH	0.136165					CASP9	NR1H3	0.622656
								JUN	CYP17A1	0.506041
acacetin	ADRB2	CYP1B1	1					MAP2	RORC	0.431039
	FASLG	CYP19A1	0.353074					PON1	CYP19A1	0.314405
	AR	CA7	0.25429					PRKCA	ESR2	0.306044
	BAX	CA12	0.25429					TGFB1	ESR1	0.222798
	BCL2	CA4	0.25429					ACHE	SHBG	0.189458
	CALM3	CBR1	0.25429					CHRM4	SREBF2	0.17281
	CASP3	ABCC1	0.237885					DRD1	CYP2C19	0.131156
	CASP8	ESR2	0.213126					NR3C1	SLC6A2	0.122827
	CDK2	ABCB1	0.213126					CHRM1	BCHE	0.122827
	CDKN1A	NOX4	0.18842					NCOA2	RORA	0.122827
	CYP19A1	TNKS2	0.180252					DPP4	PTPN1	0.122827
	FASN	TNKS	0.180252					CHRNA2	SERPINA6	0.114495
	NOS2	CDK5R1 CDK5	0.171979					CHRNA7	SLC6A4	0.106166
	PRSS1	XDH	0.171979					GSK3B	G6PD	0.106166
	PTGS1	CCNB3 CDK1 CCNB1 CCNB2	0.171979					CCNA2	NR1I3	0.106166
	PTGS2	ACHE	0.171979					SCN5A	CHRM2	0.106166
	RELA	CDK6	0.171979					CHRM3	ACHE	0.106166
	TP53	ESR1	0.171979					PDE3A	VDR	0.106166
	NCOA1	AKR1B1	0.163737					PGR	CES2	0.106166
	DPEP1	FLT3	0.163737					CDK2	NR1H2	0.106166
	GSK3B	HSD17B1	0.163737					CA2	CDC25A	0.106166
	NCOA2	ABCG2	0.163737					ESR1	PTGER1	0.106166
	CCNA2	MAOA	0.155528					PPARG	PTGER2	0.106166
	CA2	ADORA1	0.155528					PRSS1	HSD11B1	0.106166
	MAPK14	ADORA2A	0.155528					ADRB2	DHCR7	0.106166
	PDE3A	SYK	0.155528					AR	GLRA1	0.106166
	DPP4	GSK3B	0.155528					NOS2	PPARD	0.106166
	CHEK1	TTR	0.155528					PTGS1	SQLE	0.106166
	ESR2	AKR1B10	0.155528					PIM1	PTPN6	0.106166
	PPARG	KIT	0.147257					DPEP1	FDFT1	0.106166
	PIM1	OPRD1	0.147257					CHEK1	NOS2	0.106166
	ESR1	LCK	0.147257					GABRA1	NR3C1	0.106166
		HSD17B2	0.147257					SLC6A4	CDC25B	0.106166
		ALOX15	0.139062					PTGS2	SHH	0.106166
		ALOX12	0.139062					NR3C2	UGT2B7	0.106166
		PTGS2	0.139062					OPRM1	HSD11B2	0.106166
		CSNK2A1	0.139062					MAPK14	DRD2	0.106166
		CFTR	0.139062					ADRA1B	POLB	0.106166
		PIM1	0.130792					KCNH2
		CA2	0.130792					CHRM2
		MCL1	0.130792					ADRA1D
		PTPRS	0.130792					ESR2
		PLG	0.122582
		ARG1	0.122582				kaempferol	ACHE	NOX4	1
		ALOX5	0.114338					AHR	AKR1B1	1
		CA1	0.114338					AKT1	XDH	1
		CA9	0.114338					ALOX5	TYR	1
		GRK6	0.114338					AR	FLT3	1
		APP	0.114338					BAX	CA2	1
		GLO1	0.114338					BCL2	ALOX5	1
		PARP1	0.114338					CALM3	CA7	1
		MMP9	0.114338					CASP3	HSD17B2	1
		MMP2	0.114338					CHRM1	ABCC1	1
		MMP12	0.114338					CYP1A1	HSD17B1	1
		CD38	0.114338					CYP1A2	AHR	1
		TOP1	0.114338					CYP1B1	CA12	1
		AMY1A	0.1061					CYP3A4	ESRRA	1
		PLA2G2A	0.1061					DIO1	ABCB1	1
		NAE1	0.1061					ESR1	CYP1B1	1
		CDK1	0.1061					ESR2	ABCG2	1
		KDM4E	0.1061					GSTM1	ADORA1	0.795047
		TYR	0.1061					GSTM2	CA4	0.795047
		AHR	0.1061					GSTP1	ACHE	0.768469
		ESRRA	0.1061					HAS2	MAOA	0.65802
		TERT	0.1061					HMOX1	GLO1	0.65802
		ADORA3	0.1061					ICAM1	SYK	0.65802
								IKBKB	GSK3B	0.65802
butin	PTGS1	CYP19A1	1					INSR	MMP9	0.65802
	PTGS2	CA7	0.559045					JUN	MMP2	0.65802
	RXRA	CA12	0.559045					MMP1	ALOX15	0.649781
	CDK2	CA4	0.559045					NOS2	ALOX12	0.633326
	ESR2	CYP1B1	0.559045					PGR	PTPRS	0.608446
	DPP4	ESR1	0.329868					POLD1	ADORA2A	0.567302
	PIM1	ESR2	0.329868					PPARG	CDK5R1 CDK5	0.517921
	NOS2	ABCC1	0.29706					PPP3CA	CCNB3 CDK1 CCNB1 CCNB2	0.517921
	CCNA2	HSD17B1	0.29706					MAPK8	ARG1	0.517921
	ESR1	SHBG	0.29706					PRSS1	GPR35	0.50153
	AR	CBR1	0.29706					PSMD3	ESR2	0.50153
	DPEP1	MAOB	0.182485					PTGS1	DAPK1	0.50153
	PPARG	PTGS1	0.149733					PTGS2	MPG	0.50153
	CA2	ABCG2	0.116965					RELA	SLC22A12	0.50153
	MAPK14	TAS2R31	0.108771					SELE	TTR	0.484896
	GSK3B	ADORA1	0.108771					SLC2A4	AKR1B10	0.484896
		ADORA3	0.108771					SLC6A2	TNKS2	0.484896
		AKR1C3	0.108771					SLPI	TNKS	0.484896
		MMP13	0.108771					STAT1	CDK6	0.476836
		MMP12	0.108771					TNF	CDK2	0.476836
		GRM5	0.100579					VCAM1	CYP19A1	0.427205
		PLA2G1B	0.100579					XDH	CSNK2A1	0.427205
		ACHE	0.100579					AKR1C3	EGFR	0.402643
		KLK1	0.100579					NR1I2	AVPR2	0.402643
		KLK2	0.100579					NR1I3	IGF1R	0.402643
		BACE1	0.100579					AHSA1	F2	0.402643
		CES1	0.100579					F7	PIM1	0.402643
		PPARG	0.100579					GABRA1	AURKB	0.402643
		CES2	0.100579					PIM1	DRD4	0.402643
		KIT	0.100579					MAPK14	MPO	0.402643
		SRC	0.100579					CDK1	PIK3R1	0.402643
		KDR	0.100579					NCOA2	PYGL	0.402643
		FGFR1	0.100579					DPEP1	CA1	0.402643
		MET	0.100579					CDK2	SRC	0.402643
		CA2	0.100579					ADRA1B	PTK2	0.402643
		CA1	0.100579					GSK3B	KDR	0.402643
		SLC5A2	0.100579					CHRM2	MMP13	0.402643
		ALOX12	0.100579					CCNA2	MMP3	0.402643
		POLB	0.100579					CA2	CA3	0.402643
		CHRNA7	0.100579					CHEK1	PLK1	0.402643
		EDNRA	0.100579					DPP4	CA6	0.402643
		PLA2G2A	0.100579						CDK1	0.402643
		PLA2G5	0.100579						PKN1	0.402643
		PLA2G10	0.100579						CA14	0.402643
		CA3	0.100579						CA9	0.402643
		CA6	0.100579						MET	0.402643
		CA13	0.100579						NEK2	0.402643
		CA5B	0.100579						CXCR1	0.402643
		CA5A	0.100579						CAMK2B	0.402643
		SERPINE1	0.100579						ALK	0.402643
		MMP2	0.100579						AKT1	0.402643
		DYRK1A	0.100579						NEK6	0.402643
		APP	0.100579						PLA2G1B	0.402643
		CA9	0.100579						CA5A	0.402643
		MMP9	0.100579						BACE1	0.402643
		MAPT	0.100579						AXL	0.402643
		RXRA	0.100579						NUAK1	0.402643
		NOX4	0.100579						AKR1C2	0.402643
		ESRRA	0.100579						AKR1C1	0.402643
		HSD17B14	0.100579						AKR1C3	0.402643
		ESRRB	0.100579						AKR1C4	0.402643
		BCL2	0.100579						CA13	0.402643
		CLK1	0.100579						AKR1A1	0.402643
		GRM2	0.100579						APP	0.295453
		DNMT1	0.100579						PARP1	0.295453
		ST3GAL3	0.100579						MMP12	0.295453
		FUT7	0.100579						CD38	0.295453
		FUT4	0.100579						TOP1	0.295453
		STAT1	0.100579						ESR1	0.270837
		SQLE	0.100579						PTGS2	0.270837
		NQO2	0.100579						CFTR	0.270837
		HSD17B2	0.100579						PFKFB3	0.262582
		DYRK1B	0.100579						AMY1A	0.237885
		IGF1R	0.100579						GRK6	0.237885
		INSR	0.100579						TERT	0.229686
		IGFBP3	0.100579						MAPT	0.171979
		YWHAG	0.100579
		GSK3B	0.100579				taxifolin	AKR1B1	NA	<0.1
		LCK	0.100579					APOB
		SYK	0.100579					ICAM1
		STS	0.100579					MTTP
		FFAR1	0.100579					NOS2
		HIF1A	0.100579					PTGS1
		CDK5R1 CDK5	0.100579					PTGS2
		SNCA	0.100579					RELA
		AKT1	0.100579					RXRA
		ERN1	0.100579					DGAT2
		ABCB1	0.100579					ESR1
		F3	0.100579					DPP4
		CTSB	0.100579					CDK2
		VCP	0.100579					DPEP1
		AKR1B1	0.100579					PPARG
		WEE1	0.100579					CA2
		ODC1	0.100579					GSK3B
								AR
demethylwedelolactone	PTGS2	ESR2	0.253687					PIM1
	ESR1	ESR1	0.206265					ESR2
	GSK3B	ALOX5	0.174646					MAPK14
		CBR1	0.174646					CCNA2
		GSR	0.111502
		CCND1 CDK4	0.111502				Lucidumoside D	NA	IL2	0.169661
		PDGFRB	0.111502
		FLT4	0.111502				20-Hydroxylanost-24-en-3-yl acetate	AR	PTGES	0.110612
		CDK2 CCNA1 CCNA2	0.111502					NR3C1	PTPN1	0.110612
		PLK4	0.111502						TAS2R31	0.110612
		TEK	0.111502						HSD11B1	0.110612
		AURKA	0.111502						ATP12A	0.110612
		MAP3K8	0.111502						PTGS2	0.110612
		BRAF	0.111502						CYP19A1	0.110612
		EPHB4	0.111502						PTPN2	0.110612
		SQLE	0.111502						HSD17B2	0.110612
		FGR	0.111502						ACHE	0.110612
		LYN	0.111502						F2	0.110612
		AKR1B1	0.111502						PRSS1	0.110612
		SRC	0.111502						CTRC	0.110612
		HSPA1A	0.111502						NR3C2	0.110612
		FASN	0.111502						SHBG	0.110612
		GPR35	0.111502						CYP2C19	0.110612
		EGFR	0.111502						AKR1C3	0.110612
		IGF1R	0.111502						AKR1C2	0.110612
		CA2	0.111502						AKR1C1	0.110612
		AURKB	0.111502						STS	0.110612
		CA7	0.111502						HSD11B2	0.110612
		CA1	0.111502						PREP	0.110612
		GSK3B	0.111502						EPAS1	0.110612
		PTK2	0.111502						PLA2G2A	0.110612
		KDR	0.111502						SQLE	0.110612
		PLK1	0.111502						SERPINA6	0.110612
		CA6	0.111502
		CA12	0.111502				eriodictyol	NQO1	CA7	1
		CA14	0.111502					HMOX1	CA12	1
		CA9	0.111502					NFE2L2	CA4	1
		CSNK2A1	0.111502					PTGS1	CYP1B1	1
		MET	0.111502					PTGS2	CYP19A1	0.649781
		CA4	0.111502					ESR1	PTGS1	0.295453
		CA13	0.111502					CA2	ABCC1	0.204882
		AKT1	0.111502					AR	HSD17B1	0.204882
		CA5A	0.111502					DPP4	SHBG	0.204882
		BACE1	0.111502					PIM1	CBR1	0.204882
		NUAK1	0.111502					NCOA2	ESR2	0.204882
		TNNC1 TNNT2 TNNI3	0.111502					GSK3B	ESR1	0.18842
		XDH	0.111502					CDK2	MAOB	0.147257
		INSR	0.111502					PPARG	TAS2R31	0.139062
		KCNMA1	0.111502					ESR2	ADORA1	0.139062
		ERBB2	0.111502					MAPK14	ADORA3	0.139062
		FNTA FNTB	0.111502					DPEP1	ABCG2	0.1061
		MAOA	0.111502					PRSS1	MMP13	0.1061
		NFKB1	0.111502					NOS2
								CCNA2
3'-O-Methylorobol	AR	CA7	0.285288
	CALM3	CA12	0.285288				Lucidusculine	NA	NA	<0.1
	CCNA2	CA4	0.285288
	CDK2	ABCB1	0.26156				Olitoriside	NA	NA	<0.1
	ESR1	EGFR	0.182601
	ESR2	CYP19A1	0.182601				luteolin	ADCY2	NOX4	1
	GSK3B	HSD17B2	0.182601					AKT1	AKR1B1	1
	NOS2	CBR1	0.182601					XIAP	CDK5R1 CDK5	1
	PRSS1	PTPRS	0.174646					BIRC5	XDH	1
	PTGS1	TYR	0.174646					APP	MAOA	1
	PTGS2	MIF	0.174646					AR	FLT3	1
	NCOA1	CA2	0.143102					CCND1	CA2	1
	PPARG	XDH	0.143102					BCL2L1	CCNB3 CDK1 CCNB1 CCNB2	1
	PIM1	IL2	0.127303					CASP3	ALOX5	1
	CHEK1	ESR1	0.127303					CASP7	ADORA1	1
	MAPK14	ESR2	0.127303					CASP9	CA7	1
	CA2	HSD17B1	0.127303					CCNB1	GLO1	1
		ALOX12	0.127303					CD40LG	APP	1
		TLR9	0.127303					CDK2	SYK	1
		PPARA	0.119404					CDK4	GSK3B	1
		TBXAS1	0.119404					CDKN1A	PARP1	1
		MAOA	0.119404					EGFR	TTR	1
		MGAM	0.119404					ERBB2	MMP9	1
		HTR2A	0.119404					GSTP1	CA12	1
		HTR2C	0.119404					HMOX1	MMP2	1
		ADORA1	0.119404					ICAM1	CA4	1
		ADORA2A	0.119404					IFNG	MMP12	1
		ESRRA	0.119404					IL2	CD38	1
		ESRRB	0.119404					IL4	CYP1B1	1
		ABCG2	0.119404					IL6	ABCG2	1
		ALDH2	0.119404					IL10	AKR1B10	1
		MAOB	0.119404					INSR	TNKS2	1
		NOX4	0.111502					JUN	TNKS	1
		PTGS1	0.111502					MCL1	TOP1	1
		SLC6A2	0.111502					MDM2	ARG1	1
		ALOX15	0.111502					MET	PTPRS	0.857023
		CA1	0.111502					MMP1	ABCC1	0.65802
		ABCC1	0.111502					MMP2	HSD17B1	0.65802
		CYP1B1	0.111502					MMP9	ACHE	0.600412
		PFKFB3	0.111502					NFKBIA	CDK6	0.600412
		CDC7	0.111502					NOS2	ABCB1	0.534505
		ACHE	0.111502					PCNA	HSD17B2	0.468553
		IGFBP3	0.111502					PPARG	CYP19A1	0.460289
		MCL1	0.111502					MAPK1	ESR2	0.460289
		PON1	0.111502					MAPK3	ADORA2A	0.460289
		AKR1B1	0.111502					PRSS1	CSNK2A1	0.460289
		SNCA	0.111502					PTGS1	ALOX15	0.43552
		PLAT	0.111502					PTGS2	ALOX12	0.43552
		F10	0.111502					RB1	ESR1	0.386212
		PLAU	0.111502					RELA	PTGS2	0.386212
		PTPN1	0.111502					SLC2A4	CFTR	0.386212
		IGFBP6	0.111502					TNF	AMY1A	0.361228
		IGFBP4	0.111502					TOP1	GRK6	0.361228
		IGFBP5	0.111502					TOP2A	CA1	0.33674
		IGFBP2	0.111502					TP53	CA9	0.33674
		IGFBP1	0.111502					TYR	CDK2	0.328396
		STS	0.111502					VEGFA	TERT	0.320219
								XDH	CDK1	0.303816
Pratensein	AR	CA7	0.30103					PTGES	TYR	0.287307
	CALM3	CA12	0.30103					NUF2	AHR	0.287307
	CCNA2	CA4	0.30103					CA2	ESRRA	0.287307
	CDK2	ABCB1	0.285288					DPP4	GPR35	0.279037
	ESR1	CYP19A1	0.237889					ESR2	AVPR2	0.279037
	ESR2	HSD17B2	0.237889					GSK3B	IGF1R	0.279037
	GSK3B	CBR1	0.237889					MAPK14	EGFR	0.279037
	NOS2	EGFR	0.174646					ESR1	F2	0.279037
	PRSS1	PTPRS	0.166799					PIM1	PIM1	0.279037
	PTGS1	TYR	0.150982					NCOA2	AURKB	0.279037
	PTGS2	MIF	0.150982					CCNA2	DRD4	0.279037
	NCOA2	IL2	0.143102						MPO	0.279037
	DPP4	HSD17B1	0.135202						PIK3R1	0.279037
	PPARG	XDH	0.127303						DAPK1	0.279037
	PIM1	CA2	0.127303						PYGL	0.279037
	CA2	ESR1	0.127303						SRC	0.279037
	CHEK1	ESR2	0.127303						PTK2	0.279037
	DPEP1	TLR9	0.119404						KDR	0.279037
	MAPK14	ALOX12	0.119404						MMP13	0.279037
		PPARA	0.119404						MMP3	0.279037
		ESRRA	0.119404						CA3	0.279037
		ABCG2	0.119404						PLK1	0.279037
		MAOA	0.119404						CA6	0.279037
		ADORA1	0.119404						PKN1	0.279037
		TBXAS1	0.119404						CA14	0.279037
		MGAM	0.119404						MET	0.279037
		HTR2A	0.119404						NEK2	0.279037
		HTR2C	0.119404						CXCR1	0.279037
		ADORA2A	0.119404						CAMK2B	0.279037
		ESRRB	0.119404						ALK	0.279037
		ALDH2	0.111502						AKT1	0.279037
		MAOB	0.111502						NEK6	0.279037
		PTGS1	0.111502						PLA2G1B	0.279037
		SLC6A2	0.111502						CA5A	0.279037
		NOX4	0.111502						BACE1	0.279037
		ABCC1	0.111502						AXL	0.279037
		CYP1B1	0.111502						NUAK1	0.279037
		ALOX15	0.111502						AKR1C2	0.279037
		PFKFB3	0.111502						AKR1C1	0.279037
		CA1	0.111502						AKR1C3	0.279037
		CDC7	0.111502						AKR1C4	0.279037
		PTPN1	0.111502						CA13	0.279037
		ACHE	0.111502						AKR1A1	0.279037
		PON1	0.111502						PFKFB3	0.147257
		IGFBP3	0.111502						PLG	0.147257
		AKR1B1	0.111502						KDM4E	0.147257
		SNCA	0.111502						AR	0.139062
		PLAT	0.111502
		F10	0.111502				quercetin	ACACA	NOX4	1
		PLAU	0.111502					ACHE	AVPR2	1
		DUSP3	0.111502					ACP3	AKR1B1	1
		CDC25B	0.111502					PARP1	XDH	1
		STS	0.111502					ADRB2	MAOA	1
		MCL1	0.111502					AHR	IGF1R	1
		IGFBP6	0.111502					AKT1	FLT3	1
		IGFBP4	0.111502					AKR1B1	CYP19A1	1
		IGFBP5	0.111502					ALOX5	EGFR	1
		IGFBP2	0.111502					BIRC5	F2	1
		IGFBP1	0.111502					AR	CA2	1
		CA5B	0.111502					BAX	PIM1	1
								CCND1	ALOX5	1
wedelolactone	ALOX5	ALOX5	1					BCL2	AURKB	1
	AR	CBR1	1					BCL2L1	DRD4	1
	CBR1	ESR1	0.143269					BMP2	ADORA1	1
	CDK2	ESR2	0.118277					CASP3	CA7	1
	ESR1	CA12	0.101614					CASP8	GLO1	1
	ESR2	CA9	0.101614					CASP9	MPO	1
	GDNF	CA13	0.101614					CAT	PIK3R1	1
	GSK3B	CA5B	0.101614					CAV1	ADORA2A	1
	IKBKB	GSR	0.101614					RUNX2	DAPK1	1
	IL6	AKR1B1	0.101614					RUNX1T1	PYGL	1
	PTPN2	KCNA5	0.101614					CCNB1	CA1	1
	WNT5A	KCNA3	0.101614					CD40LG	GSK3B	1
	PRSS1	ERBB2	0.101614					CDKN1A	SRC	1
	PPARG	CCND1 CDK4	0.101614					CDKN2A	PTK2	1
	CCNA2	PDGFRB	0.101614					CHUK	HSD17B2	1
		FLT4	0.101614					COL1A1	KDR	1
		CDK2 CCNA1 CCNA2	0.101614					COL3A1	MMP13	1
		PLK4	0.101614					CLDN4	MMP3	1
		TEK	0.101614					CRP	CA3	1
		AURKA	0.101614					CTSD	ALOX15	1
		MAP3K8	0.101614					CYP1A1	ABCC1	1
		BRAF	0.101614					CYP1A2	PLK1	1
		EPHB4	0.101614					CYP1B1	CA6	1
		SQLE	0.101614					CYP3A4	CDK1	1
		FGR	0.101614					NQO1	MMP9	1
		LYN	0.101614					DIO1	CA12	1
		CA7	0.101614					E2F1	MMP2	1
		CA1	0.101614					E2F2	PKN1	1
		MAOA	0.101614					EGF	CA14	1
		KCNMA1	0.101614					EGFR	CA9	1
		FEN1	0.101614					ELK1	CSNK2A1	1
		IGF1R	0.101614					ERBB2	ALOX12	1
		AURKB	0.101614					ERBB3	MET	1
		SRC	0.101614					ESR1	CA4	1
		PTK2	0.101614					ESR2	NEK2	1
		KDR	0.101614					F3	CXCR1	1
		PLK1	0.101614					FOS	CAMK2B	1
		MET	0.101614					GJA1	ALK	1
		AKT1	0.101614					CXCL2	AKT1	1
		NUAK1	0.101614					GSK3B	ABCB1	1
		CA6	0.101614					GSTM1	NEK6	1
		CA14	0.101614					GSTM2	PLA2G1B	1
		CA4	0.101614					GSTP1	CA5A	1
		CA5A	0.101614					HAS2	BACE1	1
		EGFR	0.101614					HIF1A	CYP1B1	1
		PFKFB3	0.101614					HK2	AXL	1
								HMOX1	ABCG2	1
luteolin	ADCY2	NOX4	1					HSF1	NUAK1	1
	AKT1	AKR1B1	1					HSPA5	AKR1C2	1
	XIAP	CDK5R1 CDK5	1					HSPB1	AKR1C1	1
	BIRC5	XDH	1					ICAM1	AKR1C3	1
	APP	MAOA	1					IFNG	AKR1C4	1
	AR	FLT3	1					IGF2	CA13	1
	CCND1	CA2	1					IGFBP3	AKR1A1	1
	BCL2L1	CCNB3 CDK1 CCNB1 CCNB2	1					IL1A	GPR35	1
	CASP3	ALOX5	1					IL1B	MAPT	0.680284
	CASP7	ADORA1	1					IL2	KDM4E	0.680284
	CASP9	CA7	1					IL6	TOP2A	0.680284
	CCNB1	GLO1	1					CXCL8	INSR	0.680284
	CD40LG	APP	1					IL10	ACHE	0.680284
	CDK2	SYK	1					CXCL10	MYLK	0.680284
	CDK4	GSK3B	1					INSR	SYK	0.680284
	CDKN1A	PARP1	1					IRF1	PIK3CG	0.680284
	EGFR	TTR	1					EIF6	APEX1	0.680284
	ERBB2	MMP9	1					JUN	PTPRS	0.545872
	GSTP1	CA12	1					KCNH2	ESR2	0.545872
	HMOX1	MMP2	1					MAOB	MPG	0.545872
	ICAM1	CA4	1					MMP1	SLC22A12	0.545872
	IFNG	MMP12	1					MMP2	CDK5R1 CDK5	0.538062
	IL2	CD38	1					MMP3	CCNB3 CDK1 CCNB1 CCNB2	0.538062
	IL4	CYP1B1	1					MMP9	ARG1	0.538062
	IL6	ABCG2	1					MPO	CDK6	0.498513
	IL10	AKR1B10	1					MYC	CDK2	0.498513
	INSR	TNKS2	1					NFE2L2	TYR	0.395895
	JUN	TNKS	1					NFKBIA	HSD17B1	0.395895
	MCL1	TOP1	1					NKX3-1	AHR	0.395895
	MDM2	ARG1	1					NOS2	ESRRA	0.395895
	MET	PTPRS	0.857023					NOS3	APP	0.26156
	MMP1	ABCC1	0.65802					ODC1	PARP1	0.26156
	MMP2	HSD17B1	0.65802					SERPINE1	TTR	0.26156
	MMP9	ACHE	0.600412					PCOLCE	MMP12	0.26156
	NFKBIA	CDK6	0.600412					PLAT	CD38	0.26156
	NOS2	ABCB1	0.534505					PLAU	AKR1B10	0.26156
	PCNA	HSD17B2	0.468553					POLD1	TNKS2	0.26156
	PPARG	CYP19A1	0.460289					PON1	TNKS	0.26156
	MAPK1	ESR2	0.460289					POR	TOP1	0.26156
	MAPK3	ADORA2A	0.460289					PPARA	TERT	0.198389
	PRSS1	CSNK2A1	0.460289					PPARD
	PTGS1	ALOX15	0.43552					PPARG
	PTGS2	ALOX12	0.43552					PRKCA
	RB1	ESR1	0.386212					PRKCB
	RELA	PTGS2	0.386212					MAPK1
	SLC2A4	CFTR	0.386212					MAPK3
	TNF	AMY1A	0.361228					PRSS1
	TOP1	GRK6	0.361228					PSMD3
	TOP2A	CA1	0.33674					PTEN
	TP53	CA9	0.33674					PTGER3
	TYR	CDK2	0.328396					PTGS1
	VEGFA	TERT	0.320219					PTGS2
	XDH	CDK1	0.303816					RAF1
	PTGES	TYR	0.287307					RASA1
	NUF2	AHR	0.287307					RB1
	CA2	ESRRA	0.287307					RELA
	DPP4	GPR35	0.279037					RXRA
	ESR2	AVPR2	0.279037					SCN5A
	GSK3B	IGF1R	0.279037					CCL2
	MAPK14	EGFR	0.279037					CXCL11
	ESR1	F2	0.279037					SELE
	PIM1	PIM1	0.279037					SLC2A4
	NCOA2	AURKB	0.279037					SOD1
	CCNA2	DRD4	0.279037					SOD3
		MPO	0.279037					SPP1
		PIK3R1	0.279037					STAT1
		DAPK1	0.279037					SULT1E1
		PYGL	0.279037					TGFB1
		SRC	0.279037					THBD
		PTK2	0.279037					TNF
		KDR	0.279037					TOP1
		MMP13	0.279037					TOP2A
		MMP3	0.279037					TP53
		CA3	0.279037					VCAM1
		PLK1	0.279037					VEGFA
		CA6	0.279037					XDH
		PKN1	0.279037					DCAF5
		CA14	0.279037					NR1I2
		MET	0.279037					MGAM
		NEK2	0.279037					ABCG2
		CXCR1	0.279037					NPEPPS
		CAMK2B	0.279037					NR1I3
		ALK	0.279037					ACAA2
		AKT1	0.279037					AHSA1
		NEK6	0.279037					RASSF1
		PLA2G1B	0.279037					CHEK2
		CA5A	0.279037					DUOX2
		BACE1	0.279037					HERC5
		AXL	0.279037					NCF1
		NUAK1	0.279037					PIM1
		AKR1C2	0.279037					F7
		AKR1C1	0.279037					DPEP1
		AKR1C3	0.279037					GABRA1
		AKR1C4	0.279037					CDK1
		CA13	0.279037					DPP4
		AKR1A1	0.279037					CA2
		PFKFB3	0.147257					MAPK14
		PLG	0.147257					CDK2
		KDM4E	0.147257					CCNA2
		AR	0.139062					CHEK1
								NCOA2
quercetin	ACACA	NOX4	1
	ACHE	AVPR2	1				oleanolic acid	AMY2A	CES2	0.93426
	ACP3	AKR1B1	1					CASP3	PTPN1	0.628541
	PARP1	XDH	1					CASP9	PTPN2	0.628541
	ADRB2	MAOA	1					NQO1	PTGES	0.477729
	AHR	IGF1R	1					HMOX1	PRKCH	0.393816
	AKT1	FLT3	1					ICAM1	HSD11B2	0.393816
	AKR1B1	CYP19A1	1					ESR2	PTPN11	0.393816
	ALOX5	EGFR	1					SLC6A4	HSD11B1	0.393816
	BIRC5	F2	1					PTGS1	AKR1B10	0.393816
	AR	CA2	1					NOS2	POLB	0.226318
	BAX	PIM1	1					ESR1	PTPN6	0.217893
	CCND1	ALOX5	1					NR3C1	PLA2G1B	0.150917
	BCL2	AURKB	1					CCNA2	CDC25B	0.150917
	BCL2L1	DRD4	1					RXRA	TERT	0.142507
	BMP2	ADORA1	1					PDE3A	FABP3	0.142507
	CASP3	CA7	1					MAPK14	FABP5	0.142507
	CASP8	GLO1	1					PRSS1	FABP1	0.142507
	CASP9	MPO	1					CHEK1	RORC	0.134155
	CAT	PIK3R1	1					AR	PTPRF	0.134155
	CAV1	ADORA2A	1					PTGS2	ACP1	0.134155
	RUNX2	DAPK1	1					ADRB2	NR1H3	0.134155
	RUNX1T1	PYGL	1					CA2	PDE4D	0.134155
	CCNB1	CA1	1					GSK3B	AR	0.125771
	CD40LG	GSK3B	1					PIM1	PPARG	0.125771
	CDKN1A	SRC	1					PKIA	SCD	0.125771
	CDKN2A	PTK2	1					MAOB	CDC25A	0.11739
	CHUK	HSD17B2	1					CDK2	SERPINA6	0.11739
	COL1A1	KDR	1					PPARG	SHBG	0.11739
	COL3A1	MMP13	1						G6PD	0.11739
	CLDN4	MMP3	1						CYP51A1	0.11739
	CRP	CA3	1						PREP	0.109013
	CTSD	ALOX15	1						TOP1	0.109013
	CYP1A1	ABCC1	1						CYP19A1	0.109013
	CYP1A2	PLK1	1						NPC1L1	0.109013
	CYP1B1	CA6	1						SIGMAR1	0.109013
	CYP3A4	CDK1	1						CYP17A1	0.109013
	NQO1	MMP9	1						FABP4	0.109013
	DIO1	CA12	1						PPARA	0.109013
	E2F1	MMP2	1						PPARD	0.109013
	E2F2	PKN1	1						TOP2A	0.109013
	EGF	CA14	1						MAPK3	0.100634
	EGFR	CA9	1						PGR	0.100634
	ELK1	CSNK2A1	1						NR3C1	0.100634
	ERBB2	ALOX12	1						PTGS1	0.100634
	ERBB3	MET	1						NOS2	0.100634
	ESR1	CA4	1						FAAH	0.100634
	ESR2	NEK2	1						ESR2	0.100634
	F3	CXCR1	1						FNTA FNTB	0.100634
	FOS	CAMK2B	1						HMGCR	0.100634
	GJA1	ALK	1						RORA	0.100634
	CXCL2	AKT1	1						BACE1	0.100634
	GSK3B	ABCB1	1						BCHE	0.100634
	GSTM1	NEK6	1						ALOX5	0.100634
	GSTM2	PLA2G1B	1						PTGER2	0.100634
	GSTP1	CA5A	1						SLC6A3	0.100634
	HAS2	BACE1	1						CD81	0.100634
	HIF1A	CYP1B1	1						PTGER1	0.100634
	HK2	AXL	1						IDO1	0.100634
	HMOX1	ABCG2	1						FFAR1	0.100634
	HSF1	NUAK1	1						PTGS2	0.100634
	HSPA5	AKR1C2	1						CHRM2	0.100634
	HSPB1	AKR1C1	1						SLC6A4	0.100634
	ICAM1	AKR1C3	1						CYP2C19	0.100634
	IFNG	AKR1C4	1						CES1	0.100634
	IGF2	CA13	1						SAE1 UBA2	0.100634
	IGFBP3	AKR1A1	1						ADORA3	0.100634
	IL1A	GPR35	1						PTGER4	0.100634
	IL1B	MAPT	0.680284						SRD5A2	0.100634
	IL2	KDM4E	0.680284						LTB4R	0.100634
	IL6	TOP2A	0.680284						NR1I3	0.100634
	CXCL8	INSR	0.680284						SREBF2	0.100634
	IL10	ACHE	0.680284						CTSD	0.100634
	CXCL10	MYLK	0.680284						ESR1	0.100634
	INSR	SYK	0.680284						NR1H4	0.100634
	IRF1	PIK3CG	0.680284						TRPV1	0.100634
	EIF6	APEX1	0.680284						EPHA2	0.100634
	JUN	PTPRS	0.545872						NR1I2	0.100634
	KCNH2	ESR2	0.545872						HSD17B3	0.100634
	MAOB	MPG	0.545872						CNR1	0.100634
	MMP1	SLC22A12	0.545872						SLC22A6	0.100634
	MMP2	CDK5R1 CDK5	0.538062						NR3C2	0.100634
	MMP3	CCNB3 CDK1 CCNB1 CCNB2	0.538062						HSD17B2	0.100634
	MMP9	ARG1	0.538062						CDC25C	0.100634
	MPO	CDK6	0.498513						SLC10A2	0.100634
	MYC	CDK2	0.498513						GPBAR1	0.100634
	NFE2L2	TYR	0.395895						PTGIR	0.100634
	NFKBIA	HSD17B1	0.395895						ACHE	0.100634
	NKX3-1	AHR	0.395895
	NOS2	ESRRA	0.395895				ursolic acid	ACHE	PTPN1	0.953223
	NOS3	APP	0.26156					BIRC5	POLB	0.812695
	ODC1	PARP1	0.26156					FASLG	AKR1B10	0.812695
	SERPINE1	TTR	0.26156					BAX	RORC	0.729158
	PCOLCE	MMP12	0.26156					CCND1	PTPRF	0.729158
	PLAT	CD38	0.26156					BCL2	PTPN2	0.729158
	PLAU	AKR1B10	0.26156					BCL2L1	HSD11B1	0.729158
	POLD1	TNKS2	0.26156					CASP1	ACP1	0.729158
	PON1	TNKS	0.26156					CASP3	PDE4D	0.645363
	POR	TOP1	0.26156					CASP8	PLA2G1B	0.586637
	PPARA	TERT	0.198389					CASP9	CDC25B	0.586637
	PPARD							CCND2	CD81	0.511228
	PPARG							CDK2	PTGES	0.167668
	PRKCA							CDK4	TERT	0.11739
	PRKCB							CDK6	FAAH	0.109013
	MAPK1							CDKN1A	FABP3	0.109013
	MAPK3							CREB1	FABP5	0.109013
	PRSS1							ATF2	PPARD	0.109013
	PSMD3							CSF2	FABP1	0.109013
	PTEN							FASN	NOS2	0.109013
	PTGER3							FGF2	PTPN6	0.109013
	PTGS1							FOS	SCD	0.109013
	PTGS2							GAP43	CDC25A	0.100634
	RAF1							ICAM1	PPARG	0.100634
	RASA1							IL1B	PTPN11	0.100634
	RB1							IL6	CYP19A1	0.100634
	RELA							INPPL1	FNTA FNTB	0.100634
	RXRA							JUN	NR3C2	0.100634
	SCN5A							MCL1	AR	0.100634
	CCL2							MMP1	SERPINA6	0.100634
	CXCL11							MMP2	SHBG	0.100634
	SELE							MMP3	G6PD	0.100634
	SLC2A4							MMP9	CYP51A1	0.100634
	SOD1							MMP10	PTGS2	0.100634
	SOD3							NFKBIA	PREP	0.100634
	SPP1							NOS2	PTGS1	0.100634
	STAT1							NOS3	FFAR1	0.100634
	SULT1E1							PECAM1	HSD11B2	0.100634
	TGFB1							PRKCG	PPARA	0.100634
	THBD							MAPK8	CES2	0.100634
	TNF							PTGER3	NPC1L1	0.100634
	TOP1							PTGS1	SIGMAR1	0.100634
	TOP2A							PTGS2	CYP17A1	0.100634
	TP53							PTPN1	ESR2	0.100634
	VCAM1							PTPN6	LTB4R	0.100634
	VEGFA							RELA	FABP4	0.100634
	XDH							SELE	SAE1 UBA2	0.100634
	DCAF5							SRC	NR3C1	0.100634
	NR1I2							STAT3	SLC6A3	0.100634
	MGAM							TNF	ADORA3	0.100634
	ABCG2							TP53	SLC6A4	0.100634
	NPEPPS							VEGFA	CYP2C19	0.100634
	NR1I3							MAPK8IP1	TOP1	0.100634
	ACAA2							LITAF	PGR	0.100634
	AHSA1							MAPK8IP2	NR1H3	0.100634
	RASSF1							DUOX2	PRKCH	0.100634
	CHEK2							HERC5	PTGER2	0.100634
	DUOX2							ENPP7	HMGCR	0.100634
	HERC5							AR	CHRM2	0.100634
	NCF1							ESR1	SLC6A2	0.100634
	PIM1							NR3C1	ALOX5	0.100634
	F7							CTSB	GRIK1	0.100634
	DPEP1							PLAU	GRIK2	0.100634
	GABRA1								PTGER4	0.100634
	CDK1								HSF1	0.100634
	DPP4								RORA	0.100634
	CA2								GPBAR1	0.100634
	MAPK14								NR1H4	0.100634
	CDK2								NR1I3	0.100634
	CCNA2								CES1	0.100634
	CHEK1								BACE1	0.100634
	NCOA2
