# Supplementary material for: Multilevel data integration and molecular docking approach to systematically elucidate the underlying pharmacological mechanisms of Er-Zhi-Wan against hepatocellular carcinoma
Source: Aging (Albany NY). 2022 Nov 7;14(21):8783–804. doi: 10.18632/aging.204369 (PMC9699749; doi:10.18632/aging.204369)
Supplement: Supplementary File 5 [file aging-14-204369-s005.xlsx]

## Sheet: Sheet1
Supplementary File 5. Based on the cellular senescence gene database CellAge, 153 cellular senescence-induced genes and 121 cellular senescence-inhibited genes were identified.
Entrez Id	Gene Symbol	Method	Cell Types	Cell Lines	Cancer Line?	Senescence Type	Senescence Effect
22848	AAK1	Overexpression	Embryonic kidney, Lung fibroblast	HEK293T, IMR-90, MRC-5	No	Replicative	Induces
51225	ABI3	Overexpression	Colon cancer, Thyroid cancer	ARO, WRO	Yes	Replicative	Induces
203054	ADCK5	Overexpression	Embryonic kidney, Lung fibroblast	HEK293T, IMR-90, MRC-5	No	Replicative	Induces
183	AGT	Knockout, Overexpression	Vascular smooth muscle	Primary cell	No	Replicative	Induces
207	AKT1	Overexpression	Aortic endothelial, Dermal microvascular endothelial cells, Umbilical vein endothelial	Primary cell	No	Oncogene-induced	Induces
247	ALOX15B	Overexpression	Prostate epithelial	Primary cell	No	Replicative	Induces
367	AR	Knockdown, Overexpression	Hair follicular keratinocyte	Primary cell	No	Replicative	Induces
10095	ARPC1B	Overexpression	Osteosarcoma	SaOs-2	Yes	Replicative	Induces
25842	ASF1A	Knockout, Overexpression	Lung fibroblast	Primary cell	No	Oncogene-induced, Replicative	Induces
558	AXL	Overexpression	Embryonic kidney, Lung fibroblast	HEK293T, IMR-90, MRC-5	No	Replicative	Induces
8553	BHLHE40	Overexpression	Breast cancer, Esophageal cancer	EC9706, MCF-7	Yes	Replicative, Stress-induced	Induces
640	BLK	Overexpression	Embryonic kidney, Lung fibroblast	HEK293T, IMR-90, MRC-5	No	Replicative	Induces
673	BRAF	Overexpression	Foreskin fibroblast, Melanocyte	BJ, Primary cell	No	Oncogene-induced	Induces
29117	BRD7	Knockdown	Foreskin fibroblast	BJ	No	Replicative	Induces
857	CAV1	Knockdown	Fibroblast	Primary cell	No	Replicative	Induces
284119	CAVIN1	Knockdown, Overexpression	Cervical cancer, Lung fibroblast	HeLa, IMR-90, WI-38	No	Replicative	Induces
595	CCND1	Overexpression	Fibroblast	Hs68, WI-38	No	Replicative	Induces
5129	CDK18	Overexpression	Embryonic kidney, Lung fibroblast	HEK293T, IMR-90, MRC-5	No	Replicative	Induces
1026	CDKN1A	Knockout	Fibroblast	LF1	No	Replicative	Induces
1027	CDKN1B	Overexpression	Lung fibroblast	TIG-3	No	Replicative	Induces
1028	CDKN1C	Overexpression	Liver cancer	HepG2, SNU-398	Yes	Replicative	Induces
1029	CDKN2A	Overexpression	Lung fibroblast	TIG-3	No	Replicative	Induces
55602	CDKN2AIP	Overexpression	Lung fibroblast	MRC-5, TIG-1	No	Replicative	Induces
1030	CDKN2B	Overexpression	Glioblastoma	T98G, U-251MG, U-373MG	Yes	Replicative	Induces
1051	CEBPB	Knockdown, Overexpression	Prostate cancer	LNCaP	Yes	Stress-induced	Induces
1111	CHEK1	Knockout	Colon cancer	HCT116	Yes	Stress-induced	Induces
1152	CKB	Overexpression	Embryonic kidney, Lung fibroblast	HEK293T, IMR-90, MRC-5	No	Replicative	Induces
64506	CPEB1	Knockout, Overexpression	Foreskin fibroblast, Lung fibroblast	Primary cell, WI-38	No	Replicative	Induces
2919	CXCL1	Overexpression	Ovarian fibroblast	Gro-1	No	Oncogene-induced	Induces
3576	CXCL8	Overexpression	Foreskin fibroblast, Lung fibroblast	BJ, IMR-90, WI-38	No	Replicative	Induces
3491	CYR61	Overexpression	Foreskin fibroblast, Lung fibroblast	BJ, IMR-90	No	Replicative	Induces
1643	DDB2	Knockout	Lung fibroblast	IMR-90	No	Oncogene-induced	Induces
1718	DHCR24	Mutation	Lung fibroblast	WI-38	No	Oncogene-induced	Induces
1869	E2F1	Overexpression	Lung fibroblast	WI-38	No	Replicative	Induces
26298	EHF	Overexpression	Lung fibroblast	WI-38	No	Replicative	Induces
54206	ERRFI1	Overexpression	Lung fibroblast	WI-38	No	Replicative	Induces
2113	ETS1	Overexpression	Foreskin fibroblast, Lung fibroblast	Hs68, TIG-3	No	Oncogene-induced	Induces
2114	ETS2	Overexpression	Foreskin fibroblast, Lung fibroblast	Hs68, TIG-3	No	Oncogene-induced	Induces
2130	EWSR1	Knockout	Hematopoietic stem	Primary cell	No	Replicative	Induces
10922	FASTK	Overexpression	Embryonic kidney, Lung fibroblast	HEK293T, IMR-90, MRC-5	No	Replicative	Induces
79791	FBXO31	Overexpression	Breast cancer	MCF-7	Yes	Replicative	Induces
2626	GATA4	Knockdown, Overexpression	Foreskin fibroblast, Lung fibroblast	BJ, IMR-90	No	Replicative, Stress-induced	Induces
56287	GKN1	Overexpression	Gastric cancer	AGS, MKN1	Yes	Replicative	Induces
2791	GNG11	Knockout, Overexpression	Lung fibroblast	TIG-7	No	Replicative	Induces
2870	GRK6	Overexpression	Embryonic kidney, Lung fibroblast	HEK293T, IMR-90, MRC-5	No	Replicative	Induces
3065	HDAC1	Overexpression	Cervical cancer	HeLa	Yes	Replicative	Induces
220296	HEPACAM	Overexpression	Breast cancer	MCF-7	Yes	Replicative	Induces
3101	HK3	Overexpression	Embryonic kidney, Lung fibroblast	HEK293T, IMR-90, MRC-5	No	Replicative	Induces
3265	HRAS	Overexpression	Lung fibroblast	IMR-90, WI-38	No	Oncogene-induced	Induces
3400	ID4	Overexpression	Prostate cancer	DU145	Yes	Stress-induced	Induces
3458	IFNG	Overexpression	Umbilical vein endothelial	Primary cell	No	Replicative	Induces
3484	IGFBP1	Overexpression	Breast cancer	MCF-7	Yes	Replicative	Induces
3486	IGFBP3	Knockdown	Lung fibroblast	WI-38	No	Stress-induced	Induces
3488	IGFBP5	Knockout, Overexpression	Umbilical vein endothelial	Primary cell	No	Replicative	Induces
3552	IL1A	Knockout	Umbilical vein endothelial	Primary cell	No	Replicative	Induces
3621	ING1	Overexpression	Foreskin fibroblast	Hs68	No	Replicative	Induces
3622	ING2	Knockout, Overexpression	Lung fibroblast	MRC-5	No	Replicative	Induces
3661	IRF3	Overexpression	Foreskin fibroblast	BJ	No	Replicative	Induces
3663	IRF5	Overexpression	Li Fraumeni syndrome fibroblast	MDAH041	Yes	Replicative	Induces
3665	IRF7	Overexpression	Li Fraumeni syndrome fibroblast	MDAH041	Yes	Replicative	Induces
3691	ITGB4	Knockdown	Umbilical vein endothelial	Primary cell	No	Replicative	Induces
3705	ITPK1	Overexpression	Embryonic kidney, Lung fibroblast	HEK293T, IMR-90, MRC-5	No	Replicative	Induces
3707	ITPKB	Overexpression	Embryonic kidney, Lung fibroblast	HEK293T, IMR-90, MRC-5	No	Replicative	Induces
50618	ITSN2	Knockdown, Overexpression	Foreskin fibroblast, Lung fibroblast	Hs68, WI-38	No	Stress-induced	Induces
3984	LIMK1	Overexpression	Embryonic kidney, Lung fibroblast	HEK293T, IMR-90, MRC-5	No	Replicative	Induces
5604	MAP2K1	Overexpression	Intestinal epithelial	HIEC-6	No	Replicative	Induces
5605	MAP2K2	Overexpression	Lung fibroblast	IMR-90	No	Oncogene-induced	Induces
5608	MAP2K6	Overexpression	Osteosarcoma	U2OS	Yes	Replicative	Induces
5609	MAP2K7	Overexpression	Embryonic kidney, Lung fibroblast	HEK293T, IMR-90, MRC-5	No	Replicative	Induces
9064	MAP3K6	Overexpression	Embryonic kidney, Lung fibroblast	HEK293T, IMR-90, MRC-5	No	Replicative	Induces
6885	MAP3K7	Overexpression	Embryonic kidney, Lung fibroblast	HEK293T, IMR-90, MRC-5	No	Replicative	Induces
6300	MAPK12	Overexpression	Embryonic kidney, Lung fibroblast	HEK293T, IMR-90, MRC-5	No	Replicative	Induces
1432	MAPK14	Knockout	Lung fibroblast	MRC-5, WI-38	No	Replicative, Stress-induced	Induces
8550	MAPKAPK5	Knockout	Foreskin fibroblast	BJ	No	Oncogene-induced	Induces
22983	MAST1	Overexpression	Embryonic kidney, Lung fibroblast	HEK293T, IMR-90, MRC-5	No	Replicative	Induces
4145	MATK	Overexpression	Embryonic kidney, Lung fibroblast	HEK293T, IMR-90, MRC-5	No	Replicative	Induces
10445	MCRS1	Overexpression	Foreskin fibroblast, Lung fibroblast, Mammary epithelial	H184B5F5/M10, Hs68, IMR-90	No	Replicative	Induces
126308	MOB3A	Overexpression	Embryonic kidney, Lung fibroblast	HEK293T, IMR-90, MRC-5	No	Replicative	Induces
23515	MORC3	Overexpression	Lung fibroblast	WI-38	No	Replicative	Induces
10934	MORF4	Overexpression	Fibrosarcoma	A9, HT1080	Yes	Replicative	Induces
4598	MVK	Overexpression	Embryonic kidney, Lung fibroblast	HEK293T, IMR-90, MRC-5	No	Replicative	Induces
10608	MXD4	Overexpression	Lung fibroblast	WI-38	No	Replicative	Induces
65220	NADK	Overexpression	Embryonic kidney, Lung fibroblast	HEK293T, IMR-90, MRC-5	No	Replicative	Induces
10397	NDRG1	Knockdown	Liver cancer	Hep3B, HepG2, Huh7, PLC/PRF/5	Yes	Replicative	Induces
6787	NEK4	Knockdown	Foreskin fibroblast	BJ	No	Replicative, Stress-induced	Induces
4814	NINJ1	Overexpression	Hepatoma	Huh7	Yes	Replicative	Induces
4854	NOTCH3	Knockdown	Breast cancer, Fibroblast, Foreskin fibroblast, Glioma, Melanoma	A375P, BJ, LF1, MDA-MB-231, T98G, WS1	Yes	Stress-induced	Induces
50507	NOX4	Knockdown, Overexpression	Breast epithelial, Lung fibroblast	MCF-12A, TIG-3	No	Replicative	Induces
9891	NUAK1	Knockout, Overexpression	Lung fibroblast	WI-38	No	Replicative	Induces
5015	OTX2	Overexpression	Medulloblastoma	D283, D341, D425, D458, D556, DAOY, MED8A, UW228-2	Yes	Replicative	Induces
10298	PAK4	Overexpression	Embryonic kidney, Lung fibroblast	HEK293T, IMR-90, MRC-5	No	Replicative	Induces
55193	PBRM1	Knockdown	Foreskin fibroblast	BJ	No	Replicative	Induces
7703	PCGF2	Knockout, Overexpression	Foreskin fibroblast, Lung fibroblast	BJ, MRC-5, WI-38	No	Replicative	Induces
11235	PDCD10	Knockout	Coronary artery endothelial, Lung fibroblast	IMR-90, Primary cell	No	Oncogene-induced, Replicative	Induces
149420	PDIK1L	Overexpression	Embryonic kidney, Lung fibroblast	HEK293T, IMR-90, MRC-5	No	Replicative	Induces
5170	PDPK1	Overexpression	Embryonic kidney, Lung fibroblast	HEK293T, IMR-90, MRC-5	No	Replicative	Induces
23037	PDZD2	Overexpression	Breast cancer, Liver cancer, Prostate cancer	DU145	Yes	Replicative	Induces
5037	PEBP1	Knockdown, Overexpression	Colon cancer, Gastric cancer, Lung cancer, Prostate cancer	A549, HCT116, MKN45, PC-3	Yes	Stress-induced	Induces
5824	PEX19	Overexpression	Osteosarcoma	U2OS	Yes	Stress-induced	Induces
51588	PIAS4	Overexpression	Lung fibroblast	WI-38	No	Replicative	Induces
23533	PIK3R5	Overexpression	Embryonic kidney, Lung fibroblast	HEK293T, IMR-90, MRC-5	No	Replicative	Induces
5292	PIM1	Knockdown, Overexpression	Foreskin fibroblast, Lung fibroblast	2BS, BJ, WI-38	No	Oncogene-induced, Replicative	Induces
5315	PKM	Overexpression	Embryonic kidney, Lung fibroblast	HEK293T, IMR-90, MRC-5	No	Replicative	Induces
22925	PLA2R1	Knockout, Overexpression	Lung fibroblast	IMR-90, WI-38	No	Replicative	Induces
5371	PML	Overexpression	Lung fibroblast	WI-38	No	Oncogene-induced	Induces
10654	PMVK	Overexpression	Embryonic kidney, Lung fibroblast	HEK293T, IMR-90, MRC-5	No	Replicative	Induces
87178	PNPT1	Overexpression	Melanoma	FO-1, HO-1, MeWo	Yes	Replicative	Induces
5460	POU5F1	Overexpression	Mesenchymal stromal	Primary cell	No	Replicative	Induces
5580	PRKCD	Knockdown, Overexpression	Lung fibroblast	TIG-1	No	Replicative	Induces
5583	PRKCH	Knockdown, Overexpression	Breast cancer	MCF-7	Yes	Stress-induced	Induces
5629	PROX1	Overexpression	Liver cancer	Hep3B, HepG2, Mahlavu, SK-HEP1	Yes	Replicative	Induces
9232	PTTG1	Overexpression	Foreskin fibroblast, Lung fibroblast	BJ, IMR-90, WI-38	No	Replicative	Induces
5894	RAF1	Overexpression	Lung fibroblast	IMR-90	No	Oncogene-induced	Induces
5925	RB1	Knockdown	Osteoblast	Primary cell	No	Stress-induced	Induces
6041	RNASEL	Knockout, Overexpression	Lung fibroblast	WI-38	No	Replicative	Induces
27330	RPS6KA6	Knockdown, Overexpression	Colon cancer, Lung fibroblast	IMR-90	No	Replicative	Induces
861	RUNX1	Overexpression	Foreskin fibroblast	Hs68	No	Replicative	Induces
5054	SERPINE1	Knockdown	Foreskin fibroblast	BJ, Primary cell	No	Replicative	Induces
2810	SFN	Overexpression	Melanoma	SK-MEL-147, SK-MEL-19, SK-MEL-29	Yes	Oncogene-induced	Induces
150094	SIK1	Overexpression	Embryonic kidney, Lung fibroblast	HEK293T, IMR-90, MRC-5	No	Replicative	Induces
23309	SIN3B	Knockout, Overexpression	Lung fibroblast	IMR-90	No	Replicative	Induces
64849	SLC13A3	Overexpression	Lung fibroblast, Renal tubular	MRC-5, WI-38	No	Replicative	Induces
6598	SMARCB1	Overexpression	Malignant rhabdoid tumor	G-401	Yes	Replicative	Induces
64750	SMURF2	Overexpression	Foreskin fibroblast, Lung fibroblast, Skin fibroblast	BJ, WI-38, WS1	No	Replicative	Induces
8651	SOCS1	Knockdown, Overexpression	Lung fibroblast	IMR-90	No	Oncogene-induced, Replicative	Induces
8470	SORBS2	Overexpression	Fibroblast, Keratinocyte	Primary cell	No	Replicative	Induces
6657	SOX2	Overexpression	Colon cancer, Embryonic kidney	HCT116, HEK293T, WiDr	Yes	Replicative	Induces
6660	SOX5	Overexpression	Glioma	U-1242MG, U-178MG, U-251MG, U-343MG, U-343MGa	Yes	Oncogene-induced	Induces
6667	SP1	Overexpression	Lung fibroblast	2BS	No	Replicative	Induces
10927	SPIN1	Overexpression	Cervical cancer	HeLa	Yes	Replicative	Induces
8405	SPOP	Knockdown, Overexpression	Lung fibroblast	IMR-90	No	Replicative	Induces
6720	SREBF1	Overexpression	Fibroblast	Primary cell	No	Replicative	Induces
6426	SRSF1	Overexpression	Foreskin fibroblast	BJ	No	Oncogene-induced	Induces
6777	STAT5B	Overexpression	Lung fibroblast	IMR-90	No	Replicative	Induces
282974	STK32C	Overexpression	Embryonic kidney, Lung fibroblast	HEK293T, IMR-90, MRC-5	No	Replicative	Induces
83931	STK40	Overexpression	Embryonic kidney, Lung fibroblast	HEK293T, IMR-90, MRC-5	No	Replicative	Induces
6850	SYK	Overexpression	Melanoma	501-mel, A375, SK-MEL-28	Yes	Replicative	Induces
7023	TFAP4	Overexpression	Breast cancer, Retinal pigment epithelial	hTERT-RPE, MCF-7	Yes	Replicative	Induces
7041	TGFB1I1	Knockout, Overexpression	Fibroblast	KMST-6, SUSM-1	No	Replicative	Induces
7098	TLR3	Overexpression	Fibroblast, Keratinocyte	Primary cell	No	Replicative	Induces
9966	TNFSF15	Knockout, Overexpression	Endothelial progenitor	Primary cell	No	Replicative	Induces
7150	TOP1	Knockout	Lung fibroblast	IMR-90, WI-38	No	Replicative	Induces
7157	TP53	Overexpression	Bladder cancer	EJ	Yes	Replicative, Stress-induced	Induces
8626	TP63	Knockout	Foreskin fibroblast	BJ	No	Replicative	Induces
10155	TRIM28	Knockout	Lung fibroblast	IMR-90	No	Oncogene-induced	Induces
10628	TXNIP	Knockout, Overexpression	Lung fibroblast	2BS	No	Oncogene-induced, Replicative	Induces
7297	TYK2	Overexpression	Embryonic kidney, Lung fibroblast	HEK293T, IMR-90, MRC-5	No	Replicative	Induces
80019	UBTD1	Overexpression	Breast cancer, Colorectal cancer, Gastric cancer, Gastric epithelial, Lung fibroblast, Prostate cancer	AGS, GES-1, KATO-III, LoVo, MCF-7, MKN28, MKN45, MRC-5, NCI-N87, PC-3, SGC-7901, SNU-1, SNU-16	Yes	Replicative, Stress-induced	Induces
27287	VENTX	Knockdown, Overexpression	Cervical cancer, Embryonic kidney, Lung fibroblast, Lymphoblastic leukemia, Osteosarcoma	HEK293T, HeLa, IMR-90, Nalm16, U2OS	Yes	Replicative	Induces
51384	WNT16	Knockdown	Lung fibroblast	MRC-5	No	Replicative	Induces
54739	XAF1	Knockdown, Overexpression	Dermal microvascular endothelial cells	Primary cell	No	Stress-induced	Induces
83719	YPEL3	Knockdown, Overexpression	Breast cancer	MCF-7	Yes	Stress-induced	Induces
7538	ZFP36	Overexpression	Cervical cancer	HeLa	Yes	Replicative	Induces
47	ACLY	Knockout	Dermal fibroblast	Primary cell	No	Replicative	Inhibits
231	AKR1B1	Knockdown, Overexpression	Keratinocyte	HaCat	Yes	Stress-induced	Inhibits
444	ASPH	Knockdown	Liver cancer	FOCUS, HepG2, Huh7	Yes	Replicative	Inhibits
55729	ATF7IP	Knockdown	Lung fibroblast	IMR-90	No	Stress-induced	Inhibits
472	ATM	Knockout	Foreskin fibroblast, Lung fibroblast	BJ, MRC-5, WI-38	No	Replicative	Inhibits
6790	AURKA	Knockdown	Embryonic kidney, Retinal pigment epithelial	HEK293T, hTERT-RPE1	Yes	Replicative	Inhibits
9531	BAG3	Knockdown	Glioma, Laryngeal cancer	A172, HEp2	Yes	Replicative	Inhibits
604	BCL6	Overexpression	B-cell	Primary cell	No	Replicative	Inhibits
644	BLVRA	Knockdown	Fibroblast	Primary cell	No	Stress-induced	Inhibits
648	BMI1	Knockout, Overexpression	Foreskin fibroblast, Lung fibroblast, Skin fibroblast	82-6, BJ, WI-38	No	Replicative	Inhibits
672	BRCA1	Mutation	Breast cancer	HBL100, HCC1937, MCF-7	Yes	Stress-induced	Inhibits
10950	BTG3	Knockdown	Lung fibroblast	IMR-90, WI-38	No	Replicative	Inhibits
23492	CBX7	Knockdown, Overexpression	Keratinocyte, Lung fibroblast	Primary cell, WI-38	No	Replicative	Inhibits
57332	CBX8	Overexpression	Fibroblast	TIG-3	No	Replicative	Inhibits
983	CDK1	Knockdown	Embryonic kidney, Retinal pigment epithelial	HEK293T, hTERT-RPE1	Yes	Replicative	Inhibits
8099	CDK2AP1	Knockdown	Dermal fibroblast	Primary cell	No	Replicative	Inhibits
1019	CDK4	Overexpression	Foreskin fibroblast	BJ	No	Replicative	Inhibits
1021	CDK6	Overexpression	Foreskin fibroblast	BJ	No	Replicative	Inhibits
1058	CENPA	Knockdown	Lung fibroblast	TIG-3	No	Replicative	Inhibits
1452	CSNK1A1	Knockdown	Embryonic kidney, Retinal pigment epithelial	HEK293T, hTERT-RPE1	Yes	Replicative	Inhibits
1457	CSNK2A1	Knockdown	Lung fibroblast	IMR-90	No	Replicative	Inhibits
8727	CTNNAL1	Knockdown	Lung cancer, Squamous carcinoma	A549, OC2	Yes	Replicative	Inhibits
7913	DEK	Overexpression	Foreskin keratinocyte	Primary cell	No	Replicative	Inhibits
54487	DGCR8	Knockdown	Lung fibroblast	IMR-90	No	Replicative	Inhibits
1660	DHX9	Knockdown	Lung fibroblast	MRC-5	No	Replicative	Inhibits
1746	DLX2	Overexpression	Foreskin fibroblast, Lung fibroblast	BJ, IMR-90	No	Replicative	Inhibits
84661	DPY30	Knockout	Lung fibroblast	IMR-90	No	Replicative	Inhibits
80824	DUSP16	Knockdown	Embryonic kidney, Liver cancer	HEK293FT, HepG2, PLC/PRF/5	Yes	Replicative	Inhibits
1845	DUSP3	Knockdown	Cervical cancer	HeLa	Yes	Replicative	Inhibits
2021	ENDOG	Knockdown	Endothelial	Primary cell	No	Replicative	Inhibits
2042	EPHA3	Knockdown	Embryonic kidney, Retinal pigment epithelial	HEK293T, hTERT-RPE1	Yes	Replicative	Inhibits
2146	EZH2	Knockdown	Gastric cancer	SGC-7901	Yes	Stress-induced	Inhibits
2353	FOS	Overexpression	Lung fibroblast	WI-38	No	Replicative	Inhibits
2305	FOXM1	Knockdown	Gallbladder cancer	GBC-SD	Yes	Replicative	Inhibits
2309	FOXO3	Knockdown	Dermal fibroblast	Primary cell	No	Replicative	Inhibits
8087	FXR1	Knockdown, Overexpression	Laryngeal cancer, Tongue cancer	CAL27, SCC25, SCC4, SCC9, UMSCC-11A, UMSCC-11B, UMSCC-74A, UMSCC-74B	Yes	Replicative	Inhibits
2539	G6PD	Knockout	Foreskin fibroblast	Primary cell	No	Replicative	Inhibits
2597	GAPDH	Knockdown	Lung cancer	A549	Yes	Replicative	Inhibits
2720	GLB1	Knockdown	Foreskin fibroblast	Primary cell	No	Replicative	Inhibits
9759	HDAC4	Knockout, Overexpression	Lung fibroblast	2BS	No	Replicative	Inhibits
3096	HIVEP1	Knockdown	Foreskin fibroblast	Primary cell	No	Replicative	Inhibits
55355	HJURP	Knockdown, Overexpression	Dermal fibroblast, Umbilical vein endothelial	Primary cell	No	Replicative	Inhibits
3146	HMGB1	Knockdown	Lung cancer, Melanoma	A375, G361, NCI-H1299, SK-MEL-28	Yes	Replicative	Inhibits
3309	HSPA5	Knockout, Overexpression	Ovarian cancer	A2780	Yes	Stress-induced	Inhibits
3316	HSPB2	Knockdown, Overexpression	Breast epithelial	MCF-10A, MCF-7	No	Stress-induced	Inhibits
3397	ID1	Overexpression	Dermal endothelial, Umbilical vein endothelial	Primary cell	No	Replicative	Inhibits
3489	IGFBP6	Knockdown, Overexpression	Fibroblast	Primary cell	No	Replicative	Inhibits
3768	KCNJ12	Knockout	Breast cancer, Gastric cancer, Prostate cancer	DU145, LNCaP, MCF-7, MKN74, PC-3, SK-BR3, SNU-484, SNU-638, SNU-668, T47D	Yes	Stress-induced	Inhibits
10765	KDM5B	Knockdown	Colon cancer	Colo201, DLD1, HCT116	Yes	Replicative	Inhibits
57650	KIAA1524	Knockdown	Gastric cancer	AGS, BGC-823, HGC-27, KATO-III	Yes	Replicative	Inhibits
9365	KL	Knockdown	Lung fibroblast	MRC-5, WI-38	No	Replicative	Inhibits
9113	LATS1	Knockdown	Embryonic kidney, Retinal pigment epithelial	HEK293T, hTERT-RPE1	Yes	Replicative	Inhibits
3958	LGALS3	Knockdown	Gastric cancer	AGS, KATO-III, MKN28, SNU-1, SNU-16, SNU-216, SNU-5, SNU-601, SNU-638, SNU-668, SNU-719, YCC-2	Yes	Replicative	Inhibits
51474	LIMA1	Knockdown	Lung fibroblast	IMR-90	No	Replicative, Stress-induced	Inhibits
4085	MAD2L1	Knockdown	Breast epithelial, Lung fibroblast	IMR-90, MCF-10A	No	Replicative	Inhibits
4101	MAGEA2	Overexpression	Foreskin fibroblast	BJ	No	Oncogene-induced	Inhibits
4116	MAGOH	Knockdown	Lung fibroblast	IMR-90	No	Replicative, Stress-induced	Inhibits
55110	MAGOHB	Knockdown	Lung fibroblast	IMR-90	No	Replicative, Stress-induced	Inhibits
5606	MAP2K3	Knockdown	Embryonic kidney, Retinal pigment epithelial	HEK293T, hTERT-RPE1	Yes	Replicative	Inhibits
11184	MAP4K1	Knockdown	Embryonic kidney, Retinal pigment epithelial	HEK293T, hTERT-RPE1	Yes	Replicative	Inhibits
54708	2022-03-05	Knockdown	Cervical cancer	HeLa	Yes	Replicative	Inhibits
4170	MCL1	Knockdown, Overexpression	Colon cancer	HCT116	Yes	Stress-induced	Inhibits
4190	MDH1	Knockdown	Dermal fibroblast, Lung fibroblast	IMR-90, Primary cell	No	Replicative	Inhibits
4204	MECP2	Knockdown	Mesenchymal stem	Primary cell	No	Replicative	Inhibits
4318	MMP9	Knockdown	Medulloblastoma	DAOY	Yes	Replicative	Inhibits
4609	MYC	Knockout	Fibroblast	LF1	No	Oncogene-induced	Inhibits
4638	MYLK	Knockdown	Embryonic kidney, Retinal pigment epithelial	HEK293T, hTERT-RPE1	Yes	Replicative	Inhibits
79923	NANOG	Overexpression	Dermal fibroblast, Fibroblast	NIH3T3, Oct4-GiP	Yes	Replicative	Inhibits
4750	NEK1	Knockdown	Embryonic kidney, Retinal pigment epithelial	HEK293T, hTERT-RPE1	Yes	Replicative	Inhibits
10783	NEK6	Overexpression	Bladder cancer, Lung cancer	EJ, NCI-H1299	Yes	Replicative	Inhibits
4780	NFE2L2	Knockout	Lung fibroblast	HFL-1	No	Replicative	Inhibits
59277	NTN4	Knockdown, Overexpression	Glioma	T98G, U-251MG, U-87MG, U-U118MG	Yes	Stress-induced	Inhibits
64175	P3H1	Knockdown	Lung fibroblast	IMR-90	No	Replicative, Stress-induced	Inhibits
23598	PATZ1	Knockdown, Overexpression	Umbilical vein endothelial	Primary cell	No	Replicative	Inhibits
25913	POT1	Knockdown	Lung fibroblast	IMR-90	No	Replicative	Inhibits
5495	PPM1B	Knockdown	Lung fibroblast	IMR-90	No	Replicative	Inhibits
8493	PPM1D	Overexpression	Mesenchymal stem	Primary cell	No	Replicative	Inhibits
55170	PRMT6	Knockdown	Breast cancer, Breast epithelial	MCF-10A, MCF-7, MDA-MB-231, MDA-MB-468, SK-BR-3	Yes	Replicative	Inhibits
27339	PRPF19	Overexpression	Dermal fibroblast, Umbilical vein endothelial	Primary cell	No	Replicative	Inhibits
5693	PSMB5	Overexpression	Multipotent bone marrow stromal	Primary cell	No	Replicative	Inhibits
10213	PSMD14	Knockdown	Breast cancer, Cervical cancer, Colorectal cancer, Glioma, Lung cancer, Melanoma, Ovarian cancer, Pancreatic cancer, Prostate cancer	A427, A549, BTS49-SK-OV-3, DU145, HCC1937, HCT116, HeLa, Mia PaCa-2, NCI-H1299, NCI-H23, NCI-H460, NCI-H522, SK-BR-3, SK-LU-1, SK-MEL-2, SNB-75	Yes	Replicative	Inhibits
5885	RAD21	Knockdown	Breast cancer	MDA-MB-231	No	Replicative	Inhibits
5948	RBP2	Knockout	Cervical cancer, Gastric cancer	AGS, BGC-823, HeLa, HGC-27, KATO-III, SiHa	Yes	Replicative	Inhibits
9978	RBX1	Knockdown	Glioblastoma, Lung cancer	U87	Yes	Replicative	Inhibits
26156	RSL1D1	Knockout, Overexpression	Lung fibroblast	2BS	No	Replicative	Inhibits
10856	RUVBL2	Knockdown	Kidney cancer	A498, KRC/Y	Yes	Replicative	Inhibits
280636	SELENOH	Knockdown	Lung fibroblast	MRC-5	No	Replicative	Inhibits
29843	SENP1	Knockdown	Foreskin fibroblast	Primary cell	No	Replicative	Inhibits
59343	SENP2	Knockdown	Foreskin fibroblast	Primary cell	No	Replicative	Inhibits
57337	SENP7	Knockdown	Foreskin fibroblast	Primary cell	No	Replicative	Inhibits
6446	SGK1	Overexpression	Umbilical vein endothelial	Primary cell	No	Replicative	Inhibits
23411	SIRT1	Overexpression	Lung fibroblast	2BS	No	Replicative	Inhibits
51548	SIRT6	Knockdown	Chondrocyte	NHAC-kn	No	Replicative	Inhibits
6495	SIX1	Knockdown	Lung fibroblast	IMR-90	No	Replicative	Inhibits
9194	SLC16A7	Knockdown	Colon cancer, Gastric cancer	DLD1, HCT116, HCT8, HT29, LoVo, MKN45, MKN74, SW480	Yes	Replicative	Inhibits
6597	SMARCA4	Knockdown	Mesenchymal stem	Primary cell	No	Replicative	Inhibits
23049	SMG1	Knockdown	Embryonic kidney, Retinal pigment epithelial	HEK293T, hTERT-RPE1	Yes	Replicative	Inhibits
6615	SNAI1	Knockdown	Prostate cancer	LNCaP, PC-3	Yes	Replicative	Inhibits
6647	SOD1	Knockdown	Lung fibroblast	WI-38, WI38-SV40	No	Replicative	Inhibits
6714	SRC	Overexpression	Fibrosarcoma	HT1080	Yes	Stress-induced	Inhibits
6829	SUPT5H	Knockout	Cervical cancer	HeLa	Yes	Oncogene-induced	Inhibits
10460	TACC3	Knockout	Breast cancer	MCF-7	Yes	Stress-induced	Inhibits
6909	TBX2	Knockdown	Melanoma	B16	Yes	Replicative	Inhibits
7012	TERC	Knockdown	Cervical cancer	HeLa	Yes	Replicative	Inhibits
7014	TERF2	Knockout	Neuroblastoma	SH-SY5Y	Yes	Replicative	Inhibits
7015	TERT	Overexpression	Foreskin fibroblast, Retinal pigment epithelial	BJ, RPE-340	No	Replicative	Inhibits
7027	TFDP1	Knockdown	Cervical cancer, Lung cancer, Lung fibroblast	A549, HeLa, WI-38	Yes	Replicative	Inhibits
7114	TMSB4X	Overexpression	Nucleus pulposus	Primary cell	No	Replicative	Inhibits
8741	TNFSF13	Knockdown	Colon cancer	SW480	Yes	Replicative	Inhibits
7175	TPR	Knockdown	Cervical cancer, Melanoma, Osteosarcoma	A375, HeLa, U2OS	Yes	Replicative	Inhibits
79054	TRPM8	Knockdown	Pancreatic cancer	BxPC-3, PANC-1	Yes	Replicative	Inhibits
7295	TXN	Knockdown	Foreskin fibroblast	BJ, BJE-LT	No	Replicative	Inhibits
7398	USP1	Knockdown	Foreskin fibroblast, Lung fibroblast	BJ, WI-38	No	Oncogene-induced	Inhibits
7422	VEGFA	Overexpression	Dermal endothelial	Primary cell	No	Replicative	Inhibits
7472	WNT2	Knockdown	Lung fibroblast	WI-38	No	Replicative	Inhibits
7486	WRN	Knockdown	Fibroblast, WRN syndrome fibroblast	AG00780, AG03141	Yes	Oncogene-induced	Inhibits
7490	WT1	Knockout	Lung cancer	NCI-A549, NCI-H1299, NCI-H1437, NCI-H1568, NCI-H1650, NCI-H1975, NCI-H2009, NCI-H2126, NCI-H23, NCI-H358, NCI-H441, NCI-H460, NCI-H522, NCI-H727	Yes	Oncogene-induced	Inhibits
11059	WWP1	Knockdown, Overexpression	Lung fibroblast	2BS, WI-38	No	Replicative	Inhibits
10413	YAP1	Knockdown	Foreskin fibroblast, Lung fibroblast	BJ, IMR-90, WI-38	No	Replicative	Inhibits
64393	ZMAT3	Knockdown	Breast cancer, Dermal fibroblast, Embryonic kidney, Osteosarcoma	HEK293T, MCF-7, U2OS	Yes	Replicative	Inhibits
7707	ZNF148	Knockout	Lung cancer	NCI-H460	Yes	Replicative	Inhibits
